# Supplementary material for: Effect of substituents and promoters on the Diels–Alder cycloaddition reaction in the biorenewable synthesis of trimellitic acid
Source: Royal Society of Chemistry journal article supplement (doi:10.1039/d0ra04318d), 2020-01-01
Supplement: d0ra04318d1.pdf [file d0ra04318d1.pdf]

## Supporting Information

### Effect of Substituents and Promoters on Diels-Alder Cycloaddition

#### Reaction in Biorenewable Synthesis of Trimellitic Acid

Tuhin Suvra Khan<sup>1,\*</sup>, Shelaka Gupta<sup>2,\*</sup>, Maaz Ahmad<sup>1</sup>, Md. Imteyaz Alam<sup>1</sup>, M. Ali Haider<sup>1,\*</sup>

<sup>1</sup>Renewable Energy and Chemicals Laboratory, Department of Chemical Engineering, Indian Institute of Technology Delhi, Hauz Khas, Delhi, 110016, India.

<sup>2</sup>Department of Chemical Engineering, Indian Institute of Technology Hyderabad, Kandi, Sangareddy, 502205, India

\*Corresponding Authors Email: [tuhinsk@iitd.ac.in](mailto:tuhinsk@iitd.ac.in), [shelaka@che.iith.ac.in](mailto:shelaka@che.iith.ac.in), [haider@iitd.ac.in](mailto:haider@iitd.ac.in)  
Fax: +91-11-2658-2037; Tel: +91-11-26591016

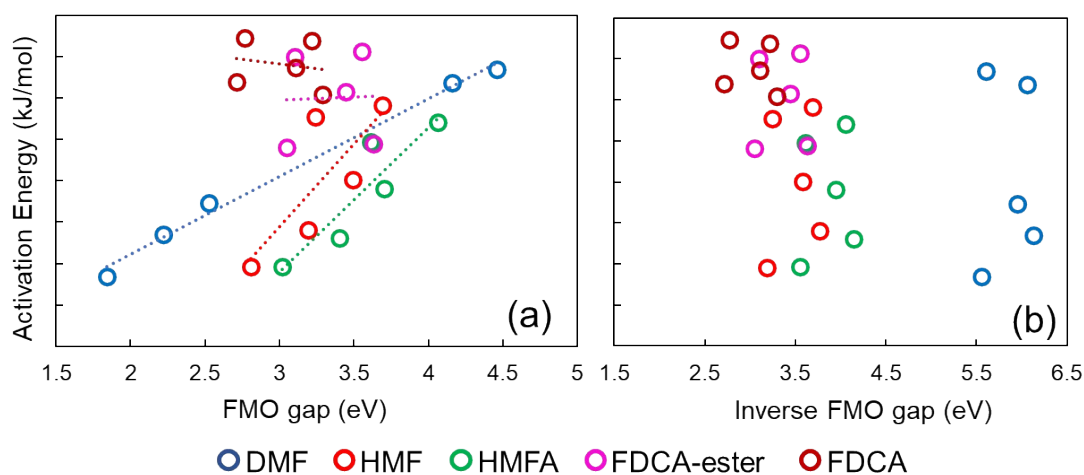

Figure SI-1. Linear scaling relationship between Activation Energy (kJ/mol) and (a) FMO gap and (b) inverse FMO gap for Diels Alder reaction of the molecules included in our scope of study.

$$\text{Normal FMO gap} = \text{HOMO}_{\text{diene}} - \text{LUMO}_{\text{dienophile}}$$

$$\text{Inverse FMO gap} = \text{HOMO}_{\text{dienophile}} - \text{LUMO}_{\text{diene}}$$

$$\text{FMO gap} = \min \{ \text{Normal FMO gap}, \text{Inverse FMO gap} \}$$

**Table SI-1.** DFT calculated activation barrier for Diels-Alder reaction between HMF+Acrolein, HMFA+Acrolein, HMF+Propylene and HMFA+Propylene using two different exchange-correlation functional, GGA BLYP and hybrid B3LYP. Grimme (G06) DFT+D vdW correction applied in both the method.

| <b>Activation Energy (<math>E_a</math>)</b> | <b>BLYP+vdW(Grimme) (kJ/mol)</b> | <b>B3LYP+vdW(Grimme) (kJ/mol)</b> |
|---------------------------------------------|----------------------------------|-----------------------------------|
| HMF+Acrolein                                | 39.2                             | 56.3                              |
| HMFA+Acrolein                               | 39.3                             | 54.6                              |
| HMF+Propylene                               | 75.5                             | 91.1                              |
| HMFA+Propylene                              | 69.5                             | 83.6                              |

**Table SI-2.** The  $R^2$  fitting parameters for the linear scaling correlation of the activation energy with normal FMO gap and FMO gap

| <b>Linear Scaling <math>R^2</math> value</b> | <b>Activation Energy vs Normal FMO gap (Figure 6)</b> | <b>Activation Energy vs FMO gap (Figure SI-1 (a))</b> |
|----------------------------------------------|-------------------------------------------------------|-------------------------------------------------------|
| DMF                                          | 0.99                                                  | 0.99                                                  |
| HMF                                          | 0.92                                                  | 0.62                                                  |
| HMFA                                         | 0.89                                                  | 0.82                                                  |
| FDCA-ester                                   | 0.88                                                  | 0.01                                                  |
| FDCA                                         | 0.87                                                  | 0.04                                                  |

**Table SI-3.** Effect of Solvent in DFT+C<sub>2</sub>H<sub>4</sub> Diels-Alder reaction

| <b>Solvent</b>   | <b>dielectric constant</b> | <b>Activation barrier (kJ/mol)</b> | <b>Reaction energy (kJ/mol)</b> | <b>FMO gap (eV)</b> |
|------------------|----------------------------|------------------------------------|---------------------------------|---------------------|
| gas-phase        | 0.00                       | 86.6                               | -28.2                           | 4.19                |
| Water            | 78.54                      | 88.1                               | -30.6                           | 4.30                |
| Acetone          | 20.70                      | 88.0                               | -30.3                           | 4.30                |
| acetonitrile     | 37.50                      | 88.0                               | -30.5                           | 4.30                |
| CCl <sub>4</sub> | 2.24                       | 87.3                               | -28.9                           | 4.24                |
| Diethyl ether    | 4.34                       | 87.7                               | -29.5                           | 4.27                |
| Ethanol          | 24.30                      | 88.0                               | -30.4                           | 4.30                |
| n-hexane         | 1.89                       | 87.2                               | -28.8                           | 4.23                |

## Coordinate of DFT optimized Dienes, Dienophiles, Oxa-norbornene cyclo-adducts and Diels-

### Alder reaction transition states

|    |             | <b>HMF</b> |          |          |
|----|-------------|------------|----------|----------|
|    | <b>ATOM</b> | <b>X</b>   | <b>Y</b> | <b>Z</b> |
| 1  | C           | 0.415361   | -0.10504 | 0.729463 |
| 2  | C           | 1.07682    | -1.2077  | 1.481522 |
| 3  | C           | 1.528209   | -2.45295 | 1.106096 |
| 4  | C           | 2.048215   | -3.06619 | 2.280177 |
| 5  | C           | 1.885563   | -2.15794 | 3.309499 |
| 6  | H           | 1.478301   | -2.86902 | 0.106408 |
| 7  | H           | 2.490967   | -4.05155 | 2.375751 |
| 8  | C           | 2.248132   | -2.25233 | 4.715014 |
| 9  | O           | 1.289138   | -1.00729 | 2.824028 |
| 10 | O           | 2.076905   | -1.37899 | 5.563541 |
| 11 | O           | -1.02019   | -0.17745 | 0.943334 |
| 12 | H           | 0.657638   | -0.21745 | -0.33994 |
| 13 | H           | 0.812502   | 0.85839  | 1.084471 |
| 14 | H           | -1.38764   | 0.696006 | 0.72124  |
| 15 | H           | 2.718719   | -3.23237 | 4.966113 |

---

-

|    |             | <b>HMFA</b> |          |          |
|----|-------------|-------------|----------|----------|
|    | <b>ATOM</b> | <b>X</b>    | <b>Y</b> | <b>Z</b> |
| 1  | C           | 0.412344    | -0.07201 | 0.774011 |
| 2  | C           | 1.062739    | -1.21369 | 1.472666 |
| 3  | C           | 1.553496    | -2.42196 | 1.033173 |
| 4  | C           | 2.040658    | -3.1104  | 2.1811   |
| 5  | C           | 1.820053    | -2.28068 | 3.257504 |
| 6  | H           | 1.553553    | -2.76622 | 0.005295 |
| 7  | H           | 2.499948    | -4.08968 | 2.236446 |
| 8  | C           | 2.12482     | -2.49175 | 4.671965 |
| 9  | O           | 2.663259    | -3.5058  | 5.101623 |
| 10 | O           | 1.218998    | -1.10642 | 2.835687 |
| 11 | O           | 1.747246    | -1.43674 | 5.471663 |
| 12 | O           | -1.02812    | -0.15918 | 0.953053 |
| 13 | H           | 0.67752     | -0.12339 | -0.2945  |
| 14 | H           | 0.795326    | 0.873445 | 1.189584 |
| 15 | H           | -1.40033    | 0.700763 | 0.689273 |
| 16 | H           | 1.996576    | -1.69879 | 6.382425 |

---

-

| <b>FDCA</b> |             |          |          |          |
|-------------|-------------|----------|----------|----------|
|             | <b>ATOM</b> | <b>X</b> | <b>Y</b> | <b>Z</b> |
| 1           | C           | 0.224546 | -0.25672 | 0.726174 |
| 2           | C           | 0.990341 | -1.25634 | 1.481756 |
| 3           | C           | 1.774555 | -2.29059 | 1.011733 |
| 4           | C           | 2.302859 | -2.94523 | 2.153418 |
| 5           | C           | 1.80955  | -2.27407 | 3.253973 |
| 6           | H           | 1.932898 | -2.52532 | -0.03359 |
| 7           | H           | 2.963345 | -3.80262 | 2.193101 |
| 8           | C           | 2.044886 | -2.53163 | 4.6803   |
| 9           | O           | 2.760451 | -3.44053 | 5.081155 |
| 10          | O           | 0.999902 | -1.23144 | 2.859352 |
| 11          | O           | 1.385172 | -1.65329 | 5.501617 |
| 12          | O           | -0.43123 | 0.640543 | 1.529699 |
| 13          | H           | -0.89867 | 1.251781 | 0.92227  |
| 14          | H           | 1.614247 | -1.91909 | 6.416984 |
| 15          | O           | 0.187528 | -0.2372  | -0.49749 |

---

-

| <b>FDCA-ester</b> |             |          |          |          |
|-------------------|-------------|----------|----------|----------|
|                   | <b>ATOM</b> | <b>X</b> | <b>Y</b> | <b>Z</b> |
| 1                 | C           | 0.107361 | -0.46854 | 0.705311 |
| 2                 | O           | 0.108494 | -0.43911 | -0.52041 |
| 3                 | C           | 0.950004 | -1.39839 | 1.472336 |
| 4                 | C           | 1.835992 | -2.35048 | 1.009724 |
| 5                 | C           | 2.385829 | -2.98069 | 2.155841 |
| 6                 | C           | 1.804302 | -2.3783  | 3.25269  |
| 7                 | H           | 2.04342  | -2.55062 | -0.03407 |
| 8                 | H           | 3.115056 | -3.77983 | 2.20131  |
| 9                 | C           | 2.017688 | -2.65541 | 4.681256 |
| 10                | O           | 2.785503 | -3.5272  | 5.073453 |
| 11                | O           | 0.919022 | -1.40119 | 2.850524 |
| 12                | O           | 1.272486 | -1.84643 | 5.48919  |
| 13                | O           | -0.65471 | 0.330825 | 1.507364 |
| 14                | C           | -1.51538 | 1.267171 | 0.782354 |
| 15                | C           | 1.455219 | -2.09124 | 6.920785 |
| 16                | H           | 2.499467 | -1.90586 | 7.200344 |
| 17                | H           | 1.192715 | -3.12886 | 7.159702 |
| 18                | H           | 0.78177  | -1.38587 | 7.414416 |
| 19                | H           | -2.05314 | 1.814284 | 1.560869 |

|    |   |          |          |          |
|----|---|----------|----------|----------|
| 20 | H | -2.20597 | 0.714772 | 0.134023 |
| 21 | H | -0.90293 | 1.941804 | 0.171991 |

-

**DMF**

|    | ATOM | X        | Y        | Z        |
|----|------|----------|----------|----------|
| 1  | C    | 0.263596 | -0.20169 | 0.659364 |
| 2  | C    | 1.068394 | -1.25796 | 1.337444 |
| 3  | C    | 1.835527 | -2.29672 | 0.889665 |
| 4  | C    | 2.371094 | -2.95604 | 2.053742 |
| 5  | C    | 1.899948 | -2.2835  | 3.14612  |
| 6  | H    | 1.999553 | -2.56121 | -0.14951 |
| 7  | H    | 3.024398 | -3.82172 | 2.076119 |
| 8  | C    | 2.078269 | -2.44651 | 4.617706 |
| 9  | O    | 1.092877 | -1.23031 | 2.728006 |
| 10 | H    | -0.78861 | -0.22669 | 0.983277 |
| 11 | H    | 0.295609 | -0.36091 | -0.4259  |
| 12 | H    | 2.535114 | -1.55082 | 5.067547 |
| 13 | H    | 2.731466 | -3.30619 | 4.812877 |
| 14 | H    | 1.114464 | -2.61683 | 5.122739 |
| 15 | H    | 0.654492 | 0.805127 | 0.875331 |

-

**Ethylene**

|   | ATOM | X        | Y        | Z        |
|---|------|----------|----------|----------|
| 1 | C    | 3.299118 | -0.75891 | 2.912178 |
| 2 | C    | 2.785321 | -0.14972 | 1.836397 |
| 3 | H    | 3.986528 | -1.6011  | 2.817063 |
| 4 | H    | 3.048829 | -0.43894 | 3.92499  |
| 5 | H    | 3.024407 | -0.47872 | 0.823763 |
| 6 | H    | 2.107997 | 0.700628 | 1.931271 |

**Propylene**

|   | ATOM | X        | Y        | Z        |
|---|------|----------|----------|----------|
| 1 | C    | 3.369315 | -0.71021 | 2.863173 |
| 2 | C    | 2.751865 | -0.12268 | 1.830701 |
| 3 | C    | 4.598968 | -1.57377 | 2.749148 |
| 4 | H    | 2.970046 | -0.56875 | 3.87129  |
| 5 | H    | 3.122525 | -0.24286 | 0.810299 |
| 6 | H    | 1.864029 | 0.494208 | 1.971898 |
| 7 | H    | 4.933977 | -1.64907 | 1.704972 |
| 8 | H    | 4.405569 | -2.59171 | 3.125758 |

9 H 5.426764 -1.16668 3.352801

---

-----  
**Acrolein**

| ATOM |   | X        | Y        | Z        |
|------|---|----------|----------|----------|
| 1    | C | 3.335623 | -0.64772 | 2.804507 |
| 2    | C | 2.747903 | -0.09387 | 1.729044 |
| 3    | C | 4.622701 | -1.38695 | 2.710468 |
| 4    | H | 2.883683 | -0.57881 | 3.795764 |
| 5    | H | 3.221549 | -0.17926 | 0.75041  |
| 6    | H | 1.803059 | 0.442838 | 1.805113 |
| 7    | O | 5.258417 | -1.5602  | 1.674335 |
| 8    | H | 4.999056 | -1.79918 | 3.6763   |

---

-----  
**Acrylic Acid**

| ATOM |   | X        | Y        | Z        |
|------|---|----------|----------|----------|
| 1    | C | 3.421009 | -0.65787 | 2.825015 |
| 2    | C | 2.782842 | -0.13403 | 1.769358 |
| 3    | C | 4.715444 | -1.38815 | 2.657349 |
| 4    | H | 3.005103 | -0.56104 | 3.830164 |
| 5    | H | 3.211489 | -0.23937 | 0.772692 |
| 6    | H | 1.838638 | 0.396633 | 1.882851 |
| 7    | O | 5.287946 | -1.56862 | 1.59995  |
| 8    | O | 5.27205  | -1.88413 | 3.826411 |
| 9    | H | 4.703786 | -1.66432 | 4.588758 |

---

-----  
**Methyl Acrylate**

| ATOM |   | X        | Y        | Z        |
|------|---|----------|----------|----------|
| 1    | C | 3.371417 | -0.58437 | 2.746519 |
| 2    | C | 2.641206 | -0.07396 | 1.743683 |
| 3    | C | 4.734542 | -1.15712 | 2.609812 |
| 4    | H | 2.994307 | -0.61778 | 3.76735  |
| 5    | H | 3.026448 | -0.04546 | 0.725639 |
| 6    | H | 1.644206 | 0.326941 | 1.925366 |
| 7    | O | 5.21549  | -1.11088 | 1.323207 |
| 8    | O | 5.365935 | -1.62421 | 3.55075  |
| 9    | C | 6.554041 | -1.67313 | 1.156481 |
| 10   | H | 6.791865 | -1.53395 | 0.098052 |
| 11   | H | 6.550216 | -2.73693 | 1.424438 |
| 12   | H | 7.268813 | -1.14239 | 1.796961 |

-----  
-----

**Oxa-norbornene (HMF+Ethylene)**

| ATOM |   | X        | Y        | Z        |
|------|---|----------|----------|----------|
| 1    | C | 0.247951 | -0.311   | 0.608825 |
| 2    | C | 1.340884 | -0.97087 | 1.432137 |
| 3    | C | 1.779673 | -2.38711 | 1.059769 |
| 4    | C | 2.227308 | -2.94639 | 2.193224 |
| 5    | C | 2.041403 | -1.87084 | 3.275423 |
| 6    | H | 1.820244 | -2.78501 | 0.049329 |
| 7    | H | 2.71827  | -3.90427 | 2.340672 |
| 8    | C | 1.96438  | -2.34128 | 4.70338  |
| 9    | O | 0.869262 | -1.1639  | 2.813742 |
| 10   | C | 3.17931  | -0.77999 | 3.015638 |
| 11   | C | 2.654565 | -0.14105 | 1.692928 |
| 12   | H | 4.17183  | -1.23531 | 2.926407 |
| 13   | H | 3.178882 | -0.05787 | 3.839892 |
| 14   | H | 3.363131 | -0.22371 | 0.860921 |
| 15   | H | 2.379135 | 0.908228 | 1.838019 |
| 16   | O | 1.093762 | -2.04299 | 5.50021  |
| 17   | O | -0.12382 | 0.977822 | 1.128111 |
| 18   | H | -0.61913 | -0.99087 | 0.57162  |
| 19   | H | 0.60925  | -0.14404 | -0.41412 |
| 20   | H | -0.3671  | 0.835153 | 2.062165 |
| 21   | H | 2.823324 | -2.99789 | 4.991886 |

-----  
-----

**Oxa-norbornene (HMF+Propylene)**

| ATOM |   | X        | Y        | Z        |
|------|---|----------|----------|----------|
| 1    | C | 0.251982 | -0.25433 | 0.626675 |
| 2    | C | 1.338806 | -0.96084 | 1.419277 |
| 3    | C | 1.749611 | -2.37279 | 1.001425 |
| 4    | C | 2.191712 | -2.9752  | 2.115171 |
| 5    | C | 2.029096 | -1.93157 | 3.229975 |
| 6    | H | 1.775645 | -2.74009 | -0.02108 |
| 7    | H | 2.662065 | -3.94748 | 2.227333 |
| 8    | C | 1.946183 | -2.44591 | 4.640489 |
| 9    | O | 0.867773 | -1.19109 | 2.796092 |
| 10   | C | 3.176146 | -0.82299 | 3.019497 |
| 11   | C | 2.668453 | -0.16587 | 1.696707 |
| 12   | C | 4.611216 | -1.35597 | 2.977481 |
| 13   | H | 3.058635 | -0.11352 | 3.847254 |

|    |   |          |          |          |
|----|---|----------|----------|----------|
| 14 | H | 3.385795 | -0.27261 | 0.873584 |
| 15 | H | 2.425073 | 0.891914 | 1.837709 |
| 16 | O | 1.083356 | -2.1553  | 5.44962  |
| 17 | O | -0.09182 | 1.022316 | 1.19346  |
| 18 | H | -0.62787 | -0.9167  | 0.574757 |
| 19 | H | 0.607202 | -0.0589  | -0.39335 |
| 20 | H | -0.32475 | 0.852116 | 2.125663 |
| 21 | H | 2.792247 | -3.12698 | 4.907812 |
| 22 | H | 4.732537 | -2.07033 | 2.151341 |
| 23 | H | 4.885182 | -1.85466 | 3.918543 |
| 24 | H | 5.315535 | -0.52754 | 2.817149 |

-----  
 ---    ---                    ---                    ---                    ---

**Oxa-norbornene (HMF+Acrolein)**

| ATOM |   | X        | Y        | Z        |
|------|---|----------|----------|----------|
| 1    | C | 0.189868 | -0.28758 | 0.635334 |
| 2    | C | 1.314506 | -0.96885 | 1.397461 |
| 3    | C | 1.726861 | -2.37974 | 0.996062 |
| 4    | C | 2.210065 | -2.95898 | 2.104672 |
| 5    | C | 2.067087 | -1.90422 | 3.202686 |
| 6    | H | 1.740824 | -2.75997 | -0.0212  |
| 7    | H | 2.711367 | -3.91536 | 2.216135 |
| 8    | C | 2.075214 | -2.36901 | 4.634952 |
| 9    | O | 0.906088 | -1.17105 | 2.803808 |
| 10   | C | 3.217917 | -0.75068 | 2.904066 |
| 11   | C | 2.645061 | -0.14457 | 1.599482 |
| 12   | C | 4.613302 | -1.32386 | 2.839897 |
| 13   | H | 3.149215 | -0.05686 | 3.751141 |
| 14   | H | 3.334903 | -0.26804 | 0.758575 |
| 15   | H | 2.387866 | 0.910409 | 1.733789 |
| 16   | O | 1.27583  | -2.0324  | 5.488115 |
| 17   | O | -0.14576 | 0.994942 | 1.191077 |
| 18   | H | -0.68342 | -0.95988 | 0.623901 |
| 19   | H | 0.508935 | -0.10655 | -0.39904 |
| 20   | H | -0.37771 | 0.838583 | 2.125601 |
| 21   | H | 2.927371 | -3.05714 | 4.862348 |
| 22   | O | 5.211625 | -1.59162 | 1.808499 |
| 23   | H | 5.07852  | -1.52655 | 3.834834 |

-----  
 ---    ---                    ---                    ---                    ---

**Oxa-norbornene (HMF+Acrylic Acid)**

| ATOM |  | X | Y | Z |
|------|--|---|---|---|
|------|--|---|---|---|



|    |   |          |          |          |
|----|---|----------|----------|----------|
| 1  | C | 0.190664 | -0.30923 | 0.614857 |
| 2  | C | 1.309828 | -0.9654  | 1.405855 |
| 3  | C | 1.784236 | -2.35894 | 0.9959   |
| 4  | C | 2.259027 | -2.93082 | 2.11158  |
| 5  | C | 2.037999 | -1.89443 | 3.223719 |
| 6  | H | 1.82698  | -2.73017 | -0.02432 |
| 7  | H | 2.779014 | -3.87601 | 2.237376 |
| 8  | C | 1.955972 | -2.44584 | 4.630795 |
| 9  | O | 0.859848 | -1.20455 | 2.787299 |
| 10 | C | 3.173151 | -0.74697 | 2.961779 |
| 11 | C | 2.601448 | -0.10242 | 1.671222 |
| 12 | C | 3.248248 | 0.210776 | 4.139863 |
| 13 | H | 3.30372  | -0.14172 | 0.832034 |
| 14 | H | 2.297817 | 0.931015 | 1.859461 |
| 15 | O | 1.043756 | -2.23183 | 5.406201 |
| 16 | O | -0.17144 | 0.976443 | 1.141398 |
| 17 | H | -0.67158 | -0.99653 | 0.601453 |
| 18 | H | 0.522851 | -0.14161 | -0.41798 |
| 19 | H | -0.34359 | 0.852605 | 2.094058 |
| 20 | H | 2.826987 | -3.08784 | 4.901528 |
| 21 | O | 2.728594 | 1.306708 | 4.227566 |
| 22 | O | 3.99014  | -0.35272 | 5.160376 |
| 23 | H | 3.94616  | 0.27302  | 5.914425 |
| 24 | H | 4.149403 | -1.22308 | 2.83039  |

-----  
 ---    ---    ---    ---    -----

**Oxa-norbornene (HMF+Methyl Acrylate)**

| ATOM |   | X        | Y        | Z        |
|------|---|----------|----------|----------|
| 1    | C | 0.161534 | -0.2567  | 0.675315 |
| 2    | C | 1.241521 | -1.04436 | 1.39742  |
| 3    | C | 1.430345 | -2.51769 | 1.040465 |
| 4    | C | 1.918476 | -3.10906 | 2.140289 |
| 5    | C | 2.013189 | -1.99289 | 3.191075 |
| 6    | H | 1.293434 | -2.94211 | 0.049336 |
| 7    | H | 2.289644 | -4.11896 | 2.276154 |
| 8    | C | 2.025456 | -2.40727 | 4.646483 |
| 9    | O | 0.913522 | -1.12905 | 2.831309 |
| 10   | C | 3.241882 | -1.05766 | 2.768011 |
| 11   | C | 2.674291 | -0.39784 | 1.467075 |
| 12   | C | 4.561306 | -1.79701 | 2.655437 |
| 13   | H | 3.359621 | -0.29076 | 3.544048 |
| 14   | H | 3.279609 | -0.62029 | 0.583077 |
| 15   | H | 2.576401 | 0.685187 | 1.581328 |

|    |   |          |          |          |
|----|---|----------|----------|----------|
| 16 | O | 1.333321 | -1.89931 | 5.510943 |
| 17 | O | 0.030232 | 1.081955 | 1.184691 |
| 18 | H | -0.78852 | -0.80938 | 0.758905 |
| 19 | H | 0.423027 | -0.16381 | -0.38669 |
| 20 | H | -0.13596 | 0.99435  | 2.14217  |
| 21 | H | 2.755269 | -3.21865 | 4.863917 |
| 22 | O | 5.478641 | -1.06146 | 1.961224 |
| 23 | O | 4.798476 | -2.89168 | 3.147329 |
| 24 | C | 6.805682 | -1.67664 | 1.848348 |
| 25 | H | 7.397003 | -0.96671 | 1.264247 |
| 26 | H | 6.72462  | -2.64423 | 1.339306 |
| 27 | H | 7.233282 | -1.82541 | 2.846808 |

-----  
 ---    ---            ---            ---            -----

**Oxa-norbornene (HMFA+Ethylene)**

| ATOM |   | X        | Y        | Z        |
|------|---|----------|----------|----------|
| 1    | C | 0.237111 | -0.31107 | 0.63341  |
| 2    | C | 1.345557 | -0.97912 | 1.428319 |
| 3    | C | 1.787359 | -2.38766 | 1.027489 |
| 4    | C | 2.246794 | -2.96493 | 2.146549 |
| 5    | C | 2.080777 | -1.91158 | 3.243853 |
| 6    | H | 1.818553 | -2.76518 | 0.009202 |
| 7    | H | 2.737546 | -3.92118 | 2.294412 |
| 8    | C | 2.04225  | -2.41648 | 4.665308 |
| 9    | O | 2.739878 | -3.33502 | 5.064644 |
| 10   | O | 0.889643 | -1.19897 | 2.813071 |
| 11   | C | 3.197895 | -0.80599 | 2.993259 |
| 12   | C | 2.655061 | -0.14454 | 1.689565 |
| 13   | H | 4.189852 | -1.25755 | 2.889371 |
| 14   | H | 3.200593 | -0.10027 | 3.831268 |
| 15   | H | 3.354501 | -0.20955 | 0.848364 |
| 16   | H | 2.376285 | 0.900926 | 1.854898 |
| 17   | O | 1.197619 | -1.6986  | 5.466336 |
| 18   | O | -0.14099 | 0.961699 | 1.188376 |
| 19   | H | -0.62422 | -0.99809 | 0.590274 |
| 20   | H | 0.584186 | -0.11613 | -0.38942 |
| 21   | H | -0.34817 | 0.79664  | 2.127404 |
| 22   | H | 1.279371 | -2.08831 | 6.363141 |

-----  
 -----

**Oxa-norbornene (HMFA+Propylene)**

| ATOM |   | X        | Y        | Z        |
|------|---|----------|----------|----------|
| 1    | C | 0.239673 | -0.25846 | 0.648603 |

|    |   |          |          |          |
|----|---|----------|----------|----------|
| 2  | C | 1.341036 | -0.96701 | 1.418346 |
| 3  | C | 1.748322 | -2.37577 | 0.983127 |
| 4  | C | 2.203715 | -2.98727 | 2.085701 |
| 5  | C | 2.065248 | -1.95669 | 3.206167 |
| 6  | H | 1.762503 | -2.73092 | -0.04364 |
| 7  | H | 2.674856 | -3.95682 | 2.205074 |
| 8  | C | 2.035293 | -2.48987 | 4.613884 |
| 9  | O | 2.756732 | -3.39963 | 4.994285 |
| 10 | O | 0.887376 | -1.21138 | 2.801133 |
| 11 | C | 3.199085 | -0.841   | 2.993154 |
| 12 | C | 2.670088 | -0.16986 | 1.685676 |
| 13 | C | 4.629691 | -1.37842 | 2.932818 |
| 14 | H | 3.090065 | -0.1415  | 3.830437 |
| 15 | H | 3.376121 | -0.26657 | 0.851797 |
| 16 | H | 2.426912 | 0.885992 | 1.841093 |
| 17 | O | 1.17784  | -1.80818 | 5.43255  |
| 18 | O | -0.10231 | 1.012428 | 1.231    |
| 19 | H | -0.63809 | -0.92425 | 0.603728 |
| 20 | H | 0.578851 | -0.05275 | -0.3748  |
| 21 | H | -0.30515 | 0.835244 | 2.168805 |
| 22 | H | 1.272019 | -2.21493 | 6.320571 |
| 23 | H | 4.750894 | -2.04791 | 2.07007  |
| 24 | H | 4.879517 | -1.93768 | 3.845035 |
| 25 | H | 5.341742 | -0.5477  | 2.826218 |

-----  
-----  
**Oxa-norbornene (HMFA+Acrolein)**

|    | ATOM | X        | Y        | Z        |
|----|------|----------|----------|----------|
| 1  | C    | 0.194859 | -0.2889  | 0.650181 |
| 2  | C    | 1.330738 | -0.95707 | 1.40664  |
| 3  | C    | 1.754407 | -2.36497 | 0.998255 |
| 4  | C    | 2.242531 | -2.94659 | 2.102466 |
| 5  | C    | 2.109919 | -1.89111 | 3.201866 |
| 6  | H    | 1.766573 | -2.73993 | -0.02084 |
| 7  | H    | 2.747405 | -3.89824 | 2.228715 |
| 8  | C    | 2.148343 | -2.3876  | 4.625366 |
| 9  | O    | 3.032276 | -3.12808 | 5.028113 |
| 10 | O    | 0.925881 | -1.17178 | 2.813626 |
| 11 | C    | 3.238977 | -0.75151 | 2.897429 |
| 12 | C    | 2.647867 | -0.11879 | 1.61277  |
| 13 | C    | 4.636595 | -1.3325  | 2.79332  |
| 14 | H    | 3.20927  | -0.06072 | 3.750443 |
| 15 | H    | 3.335146 | -0.21132 | 0.765685 |
| 16 | H    | 2.376524 | 0.929121 | 1.772019 |

|    |   |          |          |          |
|----|---|----------|----------|----------|
| 17 | O | 1.141596 | -1.90082 | 5.405704 |
| 18 | O | -0.16161 | 0.985319 | 1.214014 |
| 19 | H | -0.66812 | -0.97455 | 0.635867 |
| 20 | H | 0.509485 | -0.09656 | -0.38343 |
| 21 | H | -0.37574 | 0.820189 | 2.151164 |
| 22 | H | 1.286757 | -2.27337 | 6.302211 |
| 23 | O | 5.27419  | -1.42119 | 1.754648 |
| 24 | H | 5.051862 | -1.70947 | 3.753989 |

-----

-----

**Oxa-norbornene (HMFA+Acrylic Acid)**

| ATOM |   | X        | Y        | Z        |
|------|---|----------|----------|----------|
| 1    | C | 0.215604 | -0.30117 | 0.696482 |
| 2    | C | 1.364566 | -0.94261 | 1.45717  |
| 3    | C | 1.757508 | -2.37579 | 1.103633 |
| 4    | C | 2.259814 | -2.9258  | 2.217786 |
| 5    | C | 2.187719 | -1.80098 | 3.270328 |
| 6    | H | 1.739462 | -2.7985  | 0.103367 |
| 7    | H | 2.756085 | -3.88036 | 2.359197 |
| 8    | C | 2.165585 | -2.22549 | 4.720638 |
| 9    | O | 3.186472 | -2.44225 | 5.373494 |
| 10   | O | 0.996115 | -1.09118 | 2.881041 |
| 11   | C | 3.335871 | -0.74418 | 2.863125 |
| 12   | C | 2.683548 | -0.10766 | 1.602804 |
| 13   | C | 4.735905 | -1.34377 | 2.602349 |
| 14   | H | 3.424987 | -0.01719 | 3.679784 |
| 15   | H | 3.337873 | -0.1855  | 0.73014  |
| 16   | H | 2.410226 | 0.937114 | 1.777057 |
| 17   | O | 0.92327  | -2.37333 | 5.23064  |
| 18   | O | -0.12827 | 0.994774 | 1.214972 |
| 19   | H | -0.64903 | -0.98459 | 0.72124  |
| 20   | H | 0.514693 | -0.14959 | -0.34852 |
| 21   | H | -0.33922 | 0.867792 | 2.158481 |
| 22   | H | 1.032477 | -2.66264 | 6.162959 |
| 23   | O | 5.358528 | -1.16321 | 1.572204 |
| 24   | O | 5.270499 | -2.07927 | 3.615476 |
| 25   | H | 4.620388 | -2.1755  | 4.360398 |

-----

-----

**Oxa-norbornene (HMFA+Methyl acrylate)**

| ATOM |   | X        | Y        | Z        |
|------|---|----------|----------|----------|
| 1    | C | -0.13073 | -0.45827 | 0.735937 |
| 2    | C | 1.167709 | -0.91189 | 1.379715 |

|    |   |          |          |          |
|----|---|----------|----------|----------|
| 3  | C | 1.868397 | -2.1451  | 0.816227 |
| 4  | C | 2.545239 | -2.68798 | 1.837041 |
| 5  | C | 2.252363 | -1.79798 | 3.038067 |
| 6  | H | 1.890009 | -2.42119 | -0.2341  |
| 7  | H | 3.24283  | -3.5176  | 1.852649 |
| 8  | C | 2.436105 | -2.41512 | 4.410391 |
| 9  | O | 3.085894 | -3.42421 | 4.616937 |
| 10 | O | 0.906879 | -1.33401 | 2.771699 |
| 11 | C | 3.045383 | -0.39832 | 2.838103 |
| 12 | C | 2.276706 | 0.181904 | 1.614527 |
| 13 | C | 4.54645  | -0.59013 | 2.769864 |
| 14 | H | 2.843016 | 0.181882 | 3.741832 |
| 15 | H | 2.913905 | 0.313118 | 0.735902 |
| 16 | H | 1.792764 | 1.128677 | 1.872588 |
| 17 | O | 1.824511 | -1.68046 | 5.387546 |
| 18 | O | -0.71801 | 0.665198 | 1.416349 |
| 19 | H | -0.82476 | -1.31414 | 0.708285 |
| 20 | H | 0.067464 | -0.13196 | -0.29299 |
| 21 | H | -0.83226 | 0.393549 | 2.346157 |
| 22 | H | 2.030546 | -2.12695 | 6.236245 |
| 23 | O | 5.017617 | -0.69284 | 1.488948 |
| 24 | O | 5.253454 | -0.68885 | 3.762105 |
| 25 | C | 6.452488 | -0.96996 | 1.390717 |
| 26 | H | 6.664417 | -0.99368 | 0.318175 |
| 27 | H | 6.675727 | -1.93364 | 1.863766 |
| 28 | H | 7.022045 | -0.17957 | 1.89342  |

-----  
-----

**Oxa-norbornene (FDCA+Ethylene)**

|    | ATOM | X        | Y        | Z        |
|----|------|----------|----------|----------|
| 1  | C    | 0.291911 | -0.20508 | 0.727303 |
| 2  | C    | 1.308694 | -0.95387 | 1.555755 |
| 3  | C    | 1.663933 | -2.36661 | 1.090043 |
| 4  | C    | 2.164382 | -2.98155 | 2.169018 |
| 5  | C    | 2.114947 | -1.94368 | 3.28892  |
| 6  | H    | 1.592022 | -2.69968 | 0.060472 |
| 7  | H    | 2.616219 | -3.96196 | 2.272841 |
| 8  | C    | 2.125664 | -2.46917 | 4.705809 |
| 9  | O    | 2.700324 | -3.49389 | 5.03551  |
| 10 | O    | 0.933281 | -1.16017 | 2.948321 |
| 11 | C    | 3.265783 | -0.88629 | 2.988408 |
| 12 | C    | 2.681149 | -0.16891 | 1.733798 |
| 13 | H    | 4.22762  | -1.37798 | 2.810776 |
| 14 | H    | 3.350195 | -0.1968  | 3.834763 |

|    |   |          |          |          |
|----|---|----------|----------|----------|
| 15 | H | 3.30878  | -0.24968 | 0.840973 |
| 16 | H | 2.46695  | 0.883831 | 1.94562  |
| 17 | O | 1.481634 | -1.64038 | 5.580045 |
| 18 | O | -0.54206 | 0.574665 | 1.475856 |
| 19 | H | -1.13286 | 1.031045 | 0.838934 |
| 20 | H | 1.569642 | -2.05574 | 6.464649 |
| 21 | O | 0.267187 | -0.25728 | -0.4919  |

-----

**Oxa-norbornene (FDCA+Propylene)**

| ATOM |   | X        | Y        | Z        |
|------|---|----------|----------|----------|
| 1    | C | 0.263033 | -0.21341 | 0.741632 |
| 2    | C | 1.296778 | -0.93827 | 1.57003  |
| 3    | C | 1.663903 | -2.34407 | 1.08925  |
| 4    | C | 2.162455 | -2.96981 | 2.161784 |
| 5    | C | 2.105573 | -1.94341 | 3.292822 |
| 6    | H | 1.597932 | -2.66354 | 0.054947 |
| 7    | H | 2.618465 | -3.94915 | 2.256225 |
| 8    | C | 2.11418  | -2.48473 | 4.703671 |
| 9    | O | 2.690951 | -3.51139 | 5.023985 |
| 10   | O | 0.919814 | -1.16275 | 2.958831 |
| 11   | C | 3.24677  | -0.88015 | 3.007117 |
| 12   | C | 2.676176 | -0.1402  | 1.752546 |
| 13   | H | 4.215094 | -1.36115 | 2.835444 |
| 14   | H | 3.318036 | -0.19415 | 3.858564 |
| 15   | H | 3.302002 | -0.29892 | 0.867989 |
| 16   | C | 2.464143 | 1.359259 | 2.000616 |
| 17   | O | 1.466476 | -1.66717 | 5.586179 |
| 18   | O | -0.67139 | 0.442969 | 1.48861  |
| 19   | H | -1.26826 | 0.88658  | 0.848201 |
| 20   | H | 1.554623 | -2.0923  | 6.466048 |
| 21   | O | 0.299338 | -0.19184 | -0.47866 |
| 22   | H | 1.778134 | 1.505733 | 2.845299 |
| 23   | H | 2.044276 | 1.849301 | 1.111002 |
| 24   | H | 3.423051 | 1.841277 | 2.236658 |

-----

**Oxa-norbornene (FDCA+Acrolein)**

| ATOM |   | X        | Y        | Z        |
|------|---|----------|----------|----------|
| 1    | C | 0.260467 | -0.20388 | 0.726631 |
| 2    | C | 1.294444 | -0.92721 | 1.563667 |

|    |   |          |          |          |
|----|---|----------|----------|----------|
| 3  | C | 1.668306 | -2.33204 | 1.086626 |
| 4  | C | 2.164643 | -2.95276 | 2.16343  |
| 5  | C | 2.113897 | -1.92062 | 3.288694 |
| 6  | H | 1.598786 | -2.65408 | 0.053469 |
| 7  | H | 2.61634  | -3.93353 | 2.262988 |
| 8  | C | 2.118694 | -2.45434 | 4.704084 |
| 9  | O | 2.712171 | -3.47006 | 5.027934 |
| 10 | O | 0.929801 | -1.13639 | 2.94731  |
| 11 | C | 3.263255 | -0.86323 | 3.001154 |
| 12 | C | 2.697927 | -0.13408 | 1.754807 |
| 13 | H | 4.226618 | -1.34999 | 2.82379  |
| 14 | H | 3.340068 | -0.16344 | 3.839292 |
| 15 | H | 3.298594 | -0.26711 | 0.845417 |
| 16 | C | 2.478103 | 1.363412 | 1.939422 |
| 17 | O | 1.446181 | -1.64707 | 5.572263 |
| 18 | O | -0.64631 | 0.484469 | 1.474489 |
| 19 | H | -1.25155 | 0.926696 | 0.840716 |
| 20 | H | 1.535233 | -2.05881 | 6.458469 |
| 21 | O | 0.283229 | -0.21481 | -0.49336 |
| 22 | O | 2.793243 | 2.005536 | 2.925744 |
| 23 | H | 1.999623 | 1.860688 | 1.063149 |

-----

-----

**Oxa-norbornene (FDCA+Acrylic Acid)**

|    | ATOM | X        | Y        | Z        |
|----|------|----------|----------|----------|
| 1  | C    | 0.224605 | -0.14913 | 0.75733  |
| 2  | C    | 1.279078 | -0.84001 | 1.588411 |
| 3  | C    | 1.574683 | -2.27554 | 1.102302 |
| 4  | C    | 2.06398  | -2.91139 | 2.172026 |
| 5  | C    | 2.091683 | -1.87227 | 3.29033  |
| 6  | H    | 1.479893 | -2.60282 | 0.07225  |
| 7  | H    | 2.477884 | -3.90953 | 2.264004 |
| 8  | C    | 2.114483 | -2.39875 | 4.708098 |
| 9  | O    | 2.689776 | -3.42895 | 5.01854  |
| 10 | O    | 0.93557  | -1.03714 | 2.97346  |
| 11 | C    | 3.279147 | -0.87539 | 2.959811 |
| 12 | C    | 2.72333  | -0.12728 | 1.713849 |
| 13 | H    | 4.214106 | -1.40813 | 2.764348 |
| 14 | H    | 3.409277 | -0.17175 | 3.786643 |
| 15 | H    | 3.2992   | -0.33343 | 0.805078 |
| 16 | C    | 2.689602 | 1.406053 | 1.906439 |
| 17 | O    | 1.483315 | -1.57234 | 5.587014 |
| 18 | O    | -1.01028 | -0.17089 | 1.302427 |

|    |   |          |          |          |
|----|---|----------|----------|----------|
| 19 | H | -1.60922 | 0.282451 | 0.669481 |
| 20 | H | 1.584628 | -1.97979 | 6.473988 |
| 21 | O | 0.482713 | 0.328635 | -0.3448  |
| 22 | O | 3.013446 | 1.977094 | 2.927916 |
| 23 | O | 2.318719 | 2.124266 | 0.802317 |
| 24 | H | 1.961107 | 1.528375 | 0.10473  |

-----

-----

**Oxa-norbornene (FDCA+Methyl acrylate)**

| ATOM |   | X        | Y        | Z        |
|------|---|----------|----------|----------|
| 1    | C | 0.16465  | -0.18213 | 0.862144 |
| 2    | C | 1.262016 | -0.89715 | 1.62946  |
| 3    | C | 1.638358 | -2.28229 | 1.107637 |
| 4    | C | 2.186546 | -2.92049 | 2.147978 |
| 5    | C | 2.160037 | -1.917   | 3.298338 |
| 6    | H | 1.529727 | -2.58094 | 0.071064 |
| 7    | H | 2.658892 | -3.89487 | 2.205744 |
| 8    | C | 2.231979 | -2.48577 | 4.697988 |
| 9    | O | 2.845386 | -3.50509 | 4.969639 |
| 10   | O | 0.955673 | -1.1433  | 3.024087 |
| 11   | C | 3.285135 | -0.83637 | 2.988866 |
| 12   | C | 2.665667 | -0.08606 | 1.771281 |
| 13   | H | 4.242597 | -1.31006 | 2.752574 |
| 14   | H | 3.393128 | -0.17146 | 3.848593 |
| 15   | H | 3.237821 | -0.20864 | 0.848626 |
| 16   | C | 2.41391  | 1.4089   | 1.927336 |
| 17   | O | 1.58987  | -1.70964 | 5.618575 |
| 18   | O | -0.54201 | 0.684547 | 1.643469 |
| 19   | H | -1.18155 | 1.128552 | 1.046454 |
| 20   | H | 1.716047 | -2.15227 | 6.485169 |
| 21   | O | -0.02872 | -0.34922 | -0.32867 |
| 22   | O | 2.284187 | 1.800009 | 3.225552 |
| 23   | O | 2.294972 | 2.157573 | 0.968644 |
| 24   | C | 1.909036 | 3.203727 | 3.404371 |
| 25   | H | 0.931536 | 3.380084 | 2.94096  |
| 26   | H | 2.659243 | 3.854709 | 2.940585 |
| 27   | H | 1.867794 | 3.349066 | 4.487085 |

-----

-----

**Oxa-norbornene (FDCA-ester+Ethylene)**

| ATOM |   | X        | Y        | Z        |
|------|---|----------|----------|----------|
| 1    | C | 0.506977 | -0.49325 | 1.377571 |



|    |   |          |          |          |
|----|---|----------|----------|----------|
| 2  | O | 0.499874 | -0.57555 | -0.93165 |
| 3  | C | 2.457675 | -1.8687  | 2.949235 |
| 4  | C | 3.19544  | -4.51681 | 2.057767 |
| 5  | C | 4.161224 | -5.66925 | 4.093022 |
| 6  | C | 4.018047 | -3.72428 | 6.221305 |
| 7  | H | 3.080862 | -5.13618 | 0.107414 |
| 8  | H | 5.054501 | -7.50407 | 4.281768 |
| 9  | C | 4.055662 | -4.73896 | 8.895688 |
| 10 | O | 5.132894 | -6.69586 | 9.48408  |
| 11 | O | 1.752707 | -2.29231 | 5.578484 |
| 12 | C | 6.144335 | -1.67254 | 5.669982 |
| 13 | C | 5.014926 | -0.33036 | 3.303376 |
| 14 | H | 7.986456 | -2.55399 | 5.336807 |
| 15 | H | 6.26264  | -0.37639 | 7.278732 |
| 16 | H | 6.209675 | -0.44345 | 1.618741 |
| 17 | H | 4.562465 | 1.647445 | 3.712371 |
| 18 | O | 2.873461 | -3.16227 | 10.54005 |
| 19 | O | -1.11231 | 0.892411 | 2.804616 |
| 20 | C | -2.99044 | 2.323653 | 1.357824 |
| 21 | C | 2.909918 | -4.00591 | 13.17671 |
| 22 | H | 4.866944 | -4.18889 | 13.83302 |
| 23 | H | 1.955265 | -5.83745 | 13.34181 |
| 24 | H | 1.898627 | -2.53703 | 14.21866 |
| 25 | H | -4.15423 | 3.262572 | 2.783317 |
| 26 | H | -4.11688 | 1.031208 | 0.194766 |
| 27 | H | -2.03817 | 3.700428 | 0.136045 |

-----

-----

**Oxa-norbornene (FDCA-ester+Propylene)**

|    | ATOM | X        | Y        | Z        |
|----|------|----------|----------|----------|
| 1  | C    | 0.270231 | -0.23526 | 0.728725 |
| 2  | O    | 0.265376 | -0.26659 | -0.4938  |
| 3  | C    | 1.29493  | -0.98348 | 1.551542 |
| 4  | C    | 1.651783 | -2.39071 | 1.070249 |
| 5  | C    | 2.155888 | -3.01758 | 2.140597 |
| 6  | C    | 2.110771 | -1.99181 | 3.270239 |
| 7  | H    | 1.575408 | -2.71287 | 0.037388 |
| 8  | H    | 2.607293 | -3.99924 | 2.228797 |
| 9  | C    | 2.146402 | -2.53447 | 4.679432 |
| 10 | O    | 2.766357 | -3.54426 | 4.984368 |
| 11 | O    | 0.925389 | -1.20957 | 2.944233 |
| 12 | C    | 3.254991 | -0.90495 | 2.992685 |
| 13 | C    | 2.664013 | -0.1996  | 1.730821 |

|    |   |          |          |          |
|----|---|----------|----------|----------|
| 14 | C | 4.663333 | -1.48054 | 2.824441 |
| 15 | H | 3.222156 | -0.21227 | 3.841077 |
| 16 | H | 3.300521 | -0.2955  | 0.844589 |
| 17 | H | 2.455485 | 0.857792 | 1.926122 |
| 18 | O | 1.483344 | -1.73675 | 5.55627  |
| 19 | O | -0.5792  | 0.49869  | 1.491786 |
| 20 | C | -1.56707 | 1.272184 | 0.734187 |
| 21 | C | 1.523996 | -2.19202 | 6.948373 |
| 22 | H | 2.563879 | -2.25902 | 7.289812 |
| 23 | H | 1.048845 | -3.17677 | 7.031084 |
| 24 | H | 0.967564 | -1.43549 | 7.507693 |
| 25 | H | -2.17698 | 1.76868  | 1.49355  |
| 26 | H | -2.1711  | 0.598981 | 0.114446 |
| 27 | H | -1.05751 | 2.000974 | 0.092421 |
| 28 | H | 4.701214 | -2.14669 | 1.951807 |
| 29 | H | 4.961936 | -2.05421 | 3.712942 |
| 30 | H | 5.390276 | -0.67018 | 2.672264 |

-----

**Oxa-norbornene (FDCA-ester+Acrolein)**

|    | ATOM | X        | Y        | Z        |
|----|------|----------|----------|----------|
| 1  | C    | 0.206724 | -0.28968 | 0.727389 |
| 2  | O    | 0.070616 | -0.45923 | -0.47476 |
| 3  | C    | 1.283182 | -0.98861 | 1.531656 |
| 4  | C    | 1.652582 | -2.40141 | 1.092847 |
| 5  | C    | 2.191257 | -2.98704 | 2.169391 |
| 6  | C    | 2.150739 | -1.92447 | 3.267002 |
| 7  | H    | 1.56437  | -2.75765 | 0.072747 |
| 8  | H    | 2.674819 | -3.9518  | 2.275254 |
| 9  | C    | 2.26706  | -2.41455 | 4.692017 |
| 10 | O    | 3.111394 | -3.23774 | 5.018106 |
| 11 | O    | 0.962428 | -1.17026 | 2.949003 |
| 12 | C    | 3.285363 | -0.81592 | 2.887046 |
| 13 | C    | 2.637649 | -0.1639  | 1.64123  |
| 14 | C    | 4.660923 | -1.42756 | 2.697698 |
| 15 | H    | 3.32193  | -0.12227 | 3.737446 |
| 16 | H    | 3.259645 | -0.27062 | 0.74779  |
| 17 | H    | 2.403576 | 0.88944  | 1.82503  |
| 18 | O    | 1.39284  | -1.81443 | 5.533314 |
| 19 | O    | -0.52046 | 0.572024 | 1.482292 |
| 20 | C    | -1.55139 | 1.310253 | 0.744908 |
| 21 | C    | 1.496901 | -2.24472 | 6.933082 |
| 22 | H    | 2.506549 | -2.04412 | 7.309952 |

|    |   |          |          |          |
|----|---|----------|----------|----------|
| 23 | H | 1.285142 | -3.31775 | 7.004606 |
| 24 | H | 0.745574 | -1.65436 | 7.463509 |
| 25 | H | -2.04582 | 1.929103 | 1.498136 |
| 26 | H | -2.25338 | 0.606468 | 0.283017 |
| 27 | H | -1.08264 | 1.923721 | -0.03366 |
| 28 | O | 5.259843 | -1.47374 | 1.633894 |
| 29 | H | 5.097729 | -1.86683 | 3.62216  |

-----

**Oxa-norbornene (FDCA-ester+Acrylic Acid)**

|    | ATOM | X        | Y        | Z        |
|----|------|----------|----------|----------|
| 1  | C    | 0.218501 | -0.31287 | 0.804116 |
| 2  | O    | 0.017867 | -0.5861  | -0.36941 |
| 3  | C    | 1.320776 | -0.96611 | 1.612368 |
| 4  | C    | 1.623989 | -2.42777 | 1.293745 |
| 5  | C    | 2.205298 | -2.93466 | 2.38832  |
| 6  | C    | 2.271675 | -1.75629 | 3.376668 |
| 7  | H    | 1.472275 | -2.87725 | 0.318607 |
| 8  | H    | 2.673148 | -3.90161 | 2.540464 |
| 9  | C    | 2.367642 | -2.10375 | 4.846307 |
| 10 | O    | 3.440082 | -2.38575 | 5.388184 |
| 11 | O    | 1.079324 | -1.00666 | 3.054565 |
| 12 | C    | 3.421114 | -0.77646 | 2.812683 |
| 13 | C    | 2.689134 | -0.17191 | 1.579793 |
| 14 | C    | 4.7747   | -1.43601 | 2.462935 |
| 15 | H    | 3.607058 | -0.00885 | 3.573545 |
| 16 | H    | 3.247465 | -0.32342 | 0.652778 |
| 17 | H    | 2.478013 | 0.891635 | 1.728206 |
| 18 | O    | 1.186915 | -2.10348 | 5.478361 |
| 19 | O    | -0.44743 | 0.631694 | 1.514251 |
| 20 | C    | -1.49346 | 1.336909 | 0.764606 |
| 21 | C    | 1.238814 | -2.44759 | 6.908519 |
| 22 | H    | 1.897233 | -1.7463  | 7.432385 |
| 23 | H    | 1.616007 | -3.46944 | 7.02682  |
| 24 | H    | 0.205179 | -2.35868 | 7.250151 |
| 25 | H    | -1.94736 | 2.016993 | 1.489853 |
| 26 | H    | -2.22474 | 0.616891 | 0.379653 |
| 27 | H    | -1.04279 | 1.885393 | -0.07096 |
| 28 | O    | 5.340165 | -1.26679 | 1.397306 |
| 29 | O    | 5.339917 | -2.20146 | 3.433187 |
| 30 | H    | 4.743662 | -2.26304 | 4.228881 |

-----

**Oxa-norbornene (FDCA-ester+Methyl  
acrylate)**

| ATOM |   | X        | Y        | Z        |
|------|---|----------|----------|----------|
| 1    | C | 0.125348 | -0.25711 | 0.667736 |
| 2    | O | -0.00806 | -0.3549  | -0.54305 |
| 3    | C | 1.241156 | -0.9458  | 1.425909 |
| 4    | C | 1.716998 | -2.28955 | 0.887234 |
| 5    | C | 2.304139 | -2.90309 | 1.922012 |
| 6    | C | 2.177759 | -1.9402  | 3.093628 |
| 7    | H | 1.655744 | -2.57643 | -0.15647 |
| 8    | H | 2.852152 | -3.83695 | 1.963205 |
| 9    | C | 2.288205 | -2.53413 | 4.485393 |
| 10   | O | 2.849998 | -3.59369 | 4.713204 |
| 11   | O | 0.928337 | -1.2542  | 2.820309 |
| 12   | C | 3.191276 | -0.69642 | 2.855941 |
| 13   | C | 2.538494 | -0.03843 | 1.607203 |
| 14   | C | 4.647277 | -1.10873 | 2.802616 |
| 15   | H | 3.073655 | -0.05988 | 3.735502 |
| 16   | H | 3.173915 | -0.06513 | 0.71876  |
| 17   | H | 2.238632 | 0.990765 | 1.829984 |
| 18   | O | 1.755981 | -1.71163 | 5.423348 |
| 19   | O | -0.6396  | 0.518963 | 1.476977 |
| 20   | C | -1.70736 | 1.252182 | 0.789571 |
| 21   | C | 1.902582 | -2.18435 | 6.803761 |
| 22   | H | 2.967014 | -2.27052 | 7.05101  |
| 23   | H | 1.417026 | -3.16078 | 6.916522 |
| 24   | H | 1.410567 | -1.42302 | 7.414704 |
| 25   | H | -2.2126  | 1.817186 | 1.577048 |
| 26   | H | -2.39037 | 0.544761 | 0.305193 |
| 27   | H | -1.27463 | 1.918138 | 0.033476 |
| 28   | O | 5.047057 | -1.48484 | 1.549082 |
| 29   | O | 5.372924 | -1.13975 | 3.785608 |
| 30   | C | 6.427108 | -1.9686  | 1.469266 |
| 31   | H | 6.576009 | -2.2317  | 0.418396 |
| 32   | H | 6.553645 | -2.84056 | 2.121663 |
| 33   | H | 7.117264 | -1.17685 | 1.784094 |

-----  
-----

**Oxa-norbornene (DMF+Ethylene)**

| ATOM |   | X        | Y        | Z        |
|------|---|----------|----------|----------|
| 1    | C | 0.209339 | -0.24518 | 0.673986 |
| 2    | C | 1.314663 | -0.95403 | 1.428384 |
| 3    | C | 1.69638  | -2.37721 | 1.003474 |

|    |   |          |          |          |
|----|---|----------|----------|----------|
| 4  | C | 2.213239 | -2.96315 | 2.092437 |
| 5  | C | 2.157979 | -1.91056 | 3.20692  |
| 6  | H | 1.642792 | -2.75474 | -0.01468 |
| 7  | H | 2.687855 | -3.9371  | 2.183794 |
| 8  | C | 2.097907 | -2.38478 | 4.643455 |
| 9  | O | 0.957441 | -1.15809 | 2.835645 |
| 10 | C | 3.273811 | -0.84791 | 2.86303  |
| 11 | C | 2.67229  | -0.16476 | 1.595315 |
| 12 | H | 4.25102  | -1.31482 | 2.68908  |
| 13 | H | 3.311862 | -0.24446 | 0.707673 |
| 14 | H | 2.446974 | 0.892611 | 1.781578 |
| 15 | H | -0.70734 | -0.84943 | 0.681193 |
| 16 | H | 0.515309 | -0.07438 | -0.36805 |
| 17 | H | 1.981058 | -1.52479 | 5.316943 |
| 18 | H | 3.027616 | -2.91044 | 4.903686 |
| 19 | H | 1.25042  | -3.06814 | 4.787188 |
| 20 | H | 0.00276  | 0.726623 | 1.142484 |
| 21 | H | 3.359476 | -0.13902 | 3.695703 |

-----  
-----  
**Oxa-norbornene (DMF+Propylene)**

|    | ATOM | X        | Y        | Z        |
|----|------|----------|----------|----------|
| 1  | C    | 0.22097  | -0.20404 | 0.685034 |
| 2  | C    | 1.320381 | -0.93209 | 1.429829 |
| 3  | C    | 1.704816 | -2.3422  | 0.965472 |
| 4  | C    | 2.208662 | -2.96267 | 2.041161 |
| 5  | C    | 2.144925 | -1.94396 | 3.184572 |
| 6  | H    | 1.659224 | -2.68817 | -0.06435 |
| 7  | H    | 2.676901 | -3.9414  | 2.103878 |
| 8  | C    | 2.075729 | -2.46284 | 4.604379 |
| 9  | O    | 0.945833 | -1.1824  | 2.82581  |
| 10 | C    | 3.256731 | -0.84815 | 2.906163 |
| 11 | C    | 2.675898 | -0.15193 | 1.632523 |
| 12 | C    | 4.683837 | -1.38813 | 2.761227 |
| 13 | H    | 3.210525 | -0.15088 | 3.752411 |
| 14 | H    | 3.338544 | -0.23804 | 0.761397 |
| 15 | H    | 2.46119  | 0.908271 | 1.815673 |
| 16 | H    | -0.69738 | -0.80584 | 0.676204 |
| 17 | H    | 0.532122 | -0.01349 | -0.35202 |
| 18 | H    | 1.933982 | -1.62449 | 5.300021 |
| 19 | H    | 3.012656 | -2.97751 | 4.859941 |
| 20 | H    | 1.240953 | -3.16703 | 4.718502 |
| 21 | H    | 0.014974 | 0.759016 | 1.171511 |
| 22 | H    | 4.748881 | -2.07159 | 1.902734 |

|    |   |          |          |          |
|----|---|----------|----------|----------|
| 23 | H | 4.994694 | -1.93251 | 3.665664 |
| 24 | H | 5.395292 | -0.56541 | 2.599574 |

-----

**Oxa-norbornene (DMF+Acrolein)**

|    |   |          |          |          |
|----|---|----------|----------|----------|
| 1  | H | 0.438727 | -3.95021 | 1.387416 |
| 2  | C | 0.921877 | -3.08115 | 0.92141  |
| 3  | H | 1.583219 | -3.4307  | 0.11619  |
| 4  | C | 1.726246 | -2.30981 | 1.945238 |
| 5  | C | 2.783819 | -3.05628 | 2.759289 |
| 6  | C | 2.910904 | -2.38848 | 3.913827 |
| 7  | C | 1.928797 | -1.21919 | 3.831895 |
| 8  | H | 3.378452 | -3.88664 | 2.38793  |
| 9  | H | 3.632315 | -2.53821 | 4.71241  |
| 10 | C | 1.406151 | -0.61017 | 5.114586 |
| 11 | H | 2.233803 | -0.17109 | 5.689172 |
| 12 | H | 0.921525 | -1.38265 | 5.726137 |
| 13 | O | 0.866919 | -1.77314 | 3.013491 |
| 14 | C | 2.548354 | -0.1722  | 2.753916 |
| 15 | C | 2.413182 | -0.98044 | 1.439265 |
| 16 | C | 3.929527 | 0.299921 | 3.128827 |
| 17 | H | 1.87106  | 0.69266  | 2.777391 |
| 18 | H | 3.385212 | -1.16109 | 0.967555 |
| 19 | H | 1.746743 | -0.47356 | 0.731404 |
| 20 | H | 0.150753 | -2.43289 | 0.4839   |
| 21 | H | 0.675882 | 0.17855  | 4.889901 |
| 22 | O | 4.969591 | -0.01015 | 2.565139 |
| 23 | H | 3.953801 | 0.968997 | 4.024409 |

-----

**Oxa-norbornene (DMF+Acrylic Acid)**

|    | ATOM | X        | Y        | Z        |
|----|------|----------|----------|----------|
| 1  | C    | 0.205607 | -0.24925 | 0.677429 |
| 2  | C    | 1.314132 | -0.95721 | 1.426735 |
| 3  | C    | 1.697435 | -2.37648 | 1.005666 |
| 4  | C    | 2.207312 | -2.96847 | 2.09366  |
| 5  | C    | 2.141191 | -1.92212 | 3.207201 |
| 6  | H    | 1.661648 | -2.74758 | -0.01475 |
| 7  | H    | 2.693836 | -3.93564 | 2.180397 |
| 8  | C    | 2.094754 | -2.39325 | 4.645024 |
| 9  | O    | 0.961301 | -1.16115 | 2.841687 |
| 10 | C    | 3.264529 | -0.8074  | 2.866746 |

|    |   |          |          |          |
|----|---|----------|----------|----------|
| 11 | C | 2.670409 | -0.16334 | 1.586736 |
| 12 | C | 4.663949 | -1.38522 | 2.722904 |
| 13 | H | 3.246685 | -0.09847 | 3.704778 |
| 14 | H | 3.334191 | -0.28163 | 0.724383 |
| 15 | H | 2.451232 | 0.898604 | 1.747755 |
| 16 | H | -0.70847 | -0.8568  | 0.682867 |
| 17 | H | 0.511636 | -0.07494 | -0.36354 |
| 18 | H | 2.025022 | -1.53446 | 5.327552 |
| 19 | O | 5.245269 | -1.60512 | 1.681401 |
| 20 | O | 5.275358 | -1.71887 | 3.925518 |
| 21 | H | 4.685801 | -1.47825 | 4.66565  |
| 22 | H | 2.996433 | -2.97558 | 4.880996 |
| 23 | H | 1.220174 | -3.03782 | 4.80055  |
| 24 | H | -0.00328 | 0.72059  | 1.148352 |

-----

-----

**Oxa-norbornene (DMF+Methyl acrylate)**

|    | ATOM | X        | Y        | Z        |
|----|------|----------|----------|----------|
| 1  | C    | 0.337906 | -0.1841  | 0.632773 |
| 2  | C    | 1.394007 | -0.9108  | 1.437763 |
| 3  | C    | 1.789122 | -2.32685 | 1.01122  |
| 4  | C    | 2.226708 | -2.94382 | 2.117204 |
| 5  | C    | 2.106891 | -1.91711 | 3.246541 |
| 6  | H    | 1.803136 | -2.67941 | -0.0168  |
| 7  | H    | 2.685511 | -3.9234  | 2.220091 |
| 8  | C    | 1.979804 | -2.40379 | 4.671146 |
| 9  | O    | 0.956878 | -1.1365  | 2.821045 |
| 10 | C    | 3.269179 | -0.82525 | 2.982038 |
| 11 | C    | 2.738101 | -0.12552 | 1.697104 |
| 12 | C    | 4.639608 | -1.46948 | 2.978248 |
| 13 | H    | 3.244061 | -0.14769 | 3.842107 |
| 14 | H    | 3.428892 | -0.18254 | 0.851428 |
| 15 | H    | 2.49893  | 0.924812 | 1.902295 |
| 16 | H    | -0.58298 | -0.77993 | 0.585968 |
| 17 | H    | 0.701798 | -0.01004 | -0.38962 |
| 18 | H    | 1.78102  | -1.55256 | 5.335937 |
| 19 | O    | 5.243366 | -1.47573 | 1.747408 |
| 20 | O    | 5.148034 | -1.974   | 3.971651 |
| 21 | H    | 2.919544 | -2.87667 | 4.982404 |
| 22 | H    | 1.154508 | -3.12358 | 4.752623 |
| 23 | H    | 0.115202 | 0.786138 | 1.0967   |
| 24 | C    | 6.534771 | -2.16285 | 1.705659 |
| 25 | H    | 6.859254 | -2.09176 | 0.663445 |

|    |   |          |          |          |
|----|---|----------|----------|----------|
| 26 | H | 6.410543 | -3.20822 | 2.012594 |
| 27 | H | 7.245887 | -1.67074 | 2.379729 |

-----

**TS (HMF+Ethylene)**

| ATOM |   | X        | Y        | Z        |
|------|---|----------|----------|----------|
| 1    | C | 0.423331 | -0.15942 | 0.534732 |
| 2    | C | 1.319127 | -1.02215 | 1.397935 |
| 3    | C | 1.802128 | -2.34389 | 1.025415 |
| 4    | C | 2.089208 | -2.98651 | 2.199847 |
| 5    | C | 1.709315 | -2.08994 | 3.26047  |
| 6    | H | 2.047273 | -2.65194 | 0.014214 |
| 7    | H | 2.602457 | -3.93212 | 2.342648 |
| 8    | C | 1.670691 | -2.36439 | 4.698201 |
| 9    | O | 0.85625  | -1.13242 | 2.727365 |
| 10   | C | 3.414316 | -0.63965 | 3.043935 |
| 11   | C | 2.962282 | -0.07958 | 1.811257 |
| 12   | H | 4.265528 | -1.3168  | 3.060631 |
| 13   | H | 3.181568 | -0.13474 | 3.97895  |
| 14   | H | 3.574068 | -0.26014 | 0.926056 |
| 15   | H | 2.528708 | 0.920594 | 1.853179 |
| 16   | O | 1.025551 | -1.73189 | 5.529031 |
| 17   | O | 0.190374 | 1.148212 | 1.084493 |
| 18   | H | -0.53105 | -0.69075 | 0.378479 |
| 19   | H | 0.901846 | -0.01057 | -0.44081 |
| 20   | H | -0.18151 | 1.017706 | 1.976539 |
| 21   | H | 2.332769 | -3.21495 | 4.990143 |

-----

**TS (HMF+Propylene)**

| ATOM |   | X        | Y        | Z        |
|------|---|----------|----------|----------|
| 1    | C | 0.484247 | -0.14212 | 0.509095 |
| 2    | C | 1.38684  | -0.98505 | 1.390773 |
| 3    | C | 1.865048 | -2.3146  | 1.018948 |
| 4    | C | 2.113676 | -2.96743 | 2.198025 |
| 5    | C | 1.708644 | -2.08561 | 3.253412 |
| 6    | H | 2.12829  | -2.6204  | 0.011719 |
| 7    | H | 2.61141  | -3.92034 | 2.344872 |
| 8    | C | 1.703066 | -2.32345 | 4.688481 |
| 9    | O | 0.889111 | -1.10209 | 2.710988 |
| 10   | C | 3.494529 | -0.57367 | 2.992008 |
| 11   | C | 2.953471 | -0.02718 | 1.78451  |



|    |   |          |          |          |
|----|---|----------|----------|----------|
| 12 | C | 4.748787 | -1.40326 | 2.968168 |
| 13 | H | 3.201903 | -0.11655 | 3.935197 |
| 14 | H | 3.567154 | -0.15243 | 0.888123 |
| 15 | H | 2.493649 | 0.959818 | 1.860655 |
| 16 | O | 1.09668  | -1.65682 | 5.527136 |
| 17 | O | 0.186604 | 1.146629 | 1.070016 |
| 18 | H | -0.44249 | -0.70841 | 0.317146 |
| 19 | H | 0.986701 | 0.038944 | -0.44898 |
| 20 | H | -0.20111 | 0.988242 | 1.950924 |
| 21 | H | 2.355716 | -3.1814  | 4.981593 |
| 22 | H | 4.723197 | -2.10387 | 2.119281 |
| 23 | H | 4.889129 | -1.9713  | 3.897579 |
| 24 | H | 5.636733 | -0.76086 | 2.827994 |

-----  
-----

|    |             | <b>TS (HMF+Acrolein)</b> |          |          |
|----|-------------|--------------------------|----------|----------|
|    | <b>ATOM</b> | <b>X</b>                 | <b>Y</b> | <b>Z</b> |
| 1  | C           | 0.404593                 | -0.51809 | 1.204217 |
| 2  | C           | 2.529039                 | -1.88087 | 2.611842 |
| 3  | C           | 3.504872                 | -4.33586 | 1.809334 |
| 4  | C           | 4.383265                 | -5.50584 | 3.938049 |
| 5  | C           | 3.686444                 | -3.92702 | 6.01972  |
| 6  | H           | 3.692043                 | -4.97492 | -0.14263 |
| 7  | H           | 5.560661                 | -7.19351 | 4.089623 |
| 8  | C           | 3.974556                 | -4.47701 | 8.709906 |
| 9  | O           | 1.948626                 | -2.15626 | 5.25107  |
| 10 | C           | 6.680468                 | -0.72793 | 5.331227 |
| 11 | C           | 5.447151                 | 0.071951 | 3.030394 |
| 12 | C           | 8.983732                 | -2.22337 | 5.316451 |
| 13 | H           | 6.107271                 | 0.111607 | 7.121036 |
| 14 | H           | 6.578458                 | -0.28602 | 1.34073  |
| 15 | H           | 4.579233                 | 1.948231 | 3.135847 |
| 16 | O           | 2.65081                  | -3.60332 | 10.39497 |
| 17 | O           | -0.10381                 | 1.954317 | 2.184249 |
| 18 | H           | -1.34166                 | -1.68317 | 1.251875 |
| 19 | H           | 0.948993                 | -0.28576 | -0.78297 |
| 20 | H           | -0.49367                 | 1.740702 | 3.982837 |
| 21 | H           | 5.594404                 | -5.78327 | 9.090742 |
| 22 | O           | 10.04172                 | -3.04964 | 3.39829  |
| 23 | H           | 9.737245                 | -2.66599 | 7.242838 |

**TS (HMF+Acrylic Acid)**

|    | ATOM | X        | Y        | Z        |
|----|------|----------|----------|----------|
| 1  | C    | 0.071208 | -0.48571 | 0.842313 |
| 2  | C    | 1.289141 | -1.11058 | 1.509688 |
| 3  | C    | 1.885706 | -2.36473 | 1.014556 |
| 4  | C    | 2.419381 | -2.99474 | 2.100163 |
| 5  | C    | 2.071105 | -2.19812 | 3.24438  |
| 6  | H    | 2.048125 | -2.59867 | -0.0318  |
| 7  | H    | 3.092368 | -3.84468 | 2.114051 |
| 8  | C    | 2.420179 | -2.42627 | 4.649688 |
| 9  | O    | 1.045072 | -1.34808 | 2.912341 |
| 10 | C    | 3.477397 | -0.36732 | 2.709607 |
| 11 | C    | 2.602142 | 0.017733 | 1.613131 |
| 12 | C    | 4.750897 | -1.03332 | 2.428192 |
| 13 | H    | 3.303842 | 0.062384 | 3.694355 |
| 14 | H    | 3.09793  | -0.00702 | 0.639507 |
| 15 | H    | 2.064859 | 0.953381 | 1.790035 |
| 16 | O    | 1.927825 | -1.83375 | 5.606643 |
| 17 | O    | -0.34915 | 0.730561 | 1.477356 |
| 18 | H    | -0.74211 | -1.22809 | 0.830308 |
| 19 | H    | 0.327704 | -0.22881 | -0.19271 |
| 20 | H    | -0.57861 | 0.507384 | 2.398454 |
| 21 | H    | 3.224167 | -3.18707 | 4.77487  |
| 22 | O    | 5.064594 | -1.49112 | 1.3353   |
| 23 | O    | 5.619497 | -1.19759 | 3.502936 |
| 24 | H    | 5.24126  | -0.77308 | 4.296671 |

-----  
-----

**TS (HMF+Methyl Acrylate)**

|    | ATOM | X        | Y        | Z        |
|----|------|----------|----------|----------|
| 1  | C    | 0.918363 | -0.45016 | -0.2033  |
| 2  | C    | 1.640379 | -1.13991 | 0.944788 |
| 3  | C    | 2.172367 | -2.50203 | 0.835077 |
| 4  | C    | 2.144747 | -3.02646 | 2.097646 |
| 5  | C    | 1.503327 | -2.05242 | 2.932701 |
| 6  | H    | 2.676843 | -2.89773 | -0.0395  |
| 7  | H    | 2.603984 | -3.94168 | 2.455151 |
| 8  | C    | 1.200162 | -2.12283 | 4.366801 |
| 9  | O    | 0.848607 | -1.14077 | 2.139411 |
| 10 | C    | 3.308214 | -0.49425 | 2.883941 |
| 11 | C    | 3.01582  | -0.14416 | 1.511172 |
| 12 | C    | 4.453569 | -1.30323 | 3.303986 |

|    |   |          |          |          |
|----|---|----------|----------|----------|
| 13 | H | 2.839215 | 0.063157 | 3.688951 |
| 14 | H | 3.819772 | -0.34592 | 0.801755 |
| 15 | H | 2.580106 | 0.850146 | 1.386971 |
| 16 | O | 0.401829 | -1.39457 | 4.948201 |
| 17 | O | 0.489732 | 0.880331 | 0.120281 |
| 18 | H | 0.066007 | -1.07799 | -0.50888 |
| 19 | H | 1.608834 | -0.36053 | -1.0509  |
| 20 | H | -0.10627 | 0.810688 | 0.889069 |
| 21 | H | 1.792405 | -2.90073 | 4.898388 |
| 22 | O | 5.101683 | -1.89341 | 2.226064 |
| 23 | O | 4.810164 | -1.4766  | 4.467042 |
| 24 | C | 6.218141 | -2.75381 | 2.597674 |
| 25 | H | 6.60571  | -3.14727 | 1.653168 |
| 26 | H | 5.872576 | -3.56468 | 3.251781 |
| 27 | H | 6.98342  | -2.17282 | 3.126733 |

**TS (HMFA+Ethylene)**

| ATOM |   | X        | Y        | Z        |
|------|---|----------|----------|----------|
| 1    | C | 0.525987 | -0.07657 | 0.530629 |
| 2    | C | 1.380264 | -1.00187 | 1.365344 |
| 3    | C | 1.880221 | -2.29452 | 0.943374 |
| 4    | C | 2.137392 | -3.00083 | 2.090053 |
| 5    | C | 1.756867 | -2.1492  | 3.180764 |
| 6    | H | 2.146817 | -2.55291 | -0.07628 |
| 7    | H | 2.636922 | -3.95496 | 2.211094 |
| 8    | C | 1.658992 | -2.55207 | 4.592052 |
| 9    | O | 2.234267 | -3.52821 | 5.056591 |
| 10   | O | 0.904367 | -1.16441 | 2.679032 |
| 11   | C | 3.441808 | -0.73144 | 3.106834 |
| 12   | C | 3.079372 | -0.07718 | 1.897555 |
| 13   | H | 4.269475 | -1.4368  | 3.126483 |
| 14   | H | 3.195153 | -0.26224 | 4.057825 |
| 15   | H | 3.704534 | -0.24032 | 1.01946  |
| 16   | H | 2.645451 | 0.920338 | 1.965593 |
| 17   | O | 0.896954 | -1.69038 | 5.347918 |
| 18   | O | 0.302913 | 1.204672 | 1.146067 |
| 19   | H | -0.43537 | -0.57669 | 0.319971 |
| 20   | H | 1.032366 | 0.114872 | -0.42313 |
| 21   | H | -0.07279 | 1.030846 | 2.028773 |
| 22   | H | 0.929429 | -2.04476 | 6.261186 |

-----  
-----  
**TS (HMFA+Propylene)**

|    | ATOM | X        | Y        | Z        |
|----|------|----------|----------|----------|
| 1  | C    | 0.490446 | -0.12565 | 0.507665 |
| 2  | C    | 1.391299 | -0.99973 | 1.353917 |
| 3  | C    | 1.868061 | -2.31531 | 0.958048 |
| 4  | C    | 2.159056 | -2.98154 | 2.120633 |
| 5  | C    | 1.80148  | -2.10229 | 3.190612 |
| 6  | H    | 2.102799 | -2.6094  | -0.05955 |
| 7  | H    | 2.662461 | -3.93107 | 2.257155 |
| 8  | C    | 1.843983 | -2.40273 | 4.618378 |
| 9  | O    | 2.517453 | -3.3125  | 5.094972 |
| 10 | O    | 0.943932 | -1.123   | 2.686849 |
| 11 | C    | 3.53645  | -0.62969 | 2.956692 |
| 12 | C    | 3.038371 | -0.04629 | 1.753755 |
| 13 | C    | 4.76027  | -1.50677 | 2.968735 |
| 14 | H    | 3.263054 | -0.15025 | 3.895876 |
| 15 | H    | 3.636013 | -0.20031 | 0.852301 |
| 16 | H    | 2.588104 | 0.944423 | 1.824704 |
| 17 | O    | 1.1084   | -1.52551 | 5.386979 |
| 18 | O    | 0.239193 | 1.165676 | 1.089366 |
| 19 | H    | -0.4575  | -0.66147 | 0.329077 |
| 20 | H    | 0.975764 | 0.053444 | -0.45949 |
| 21 | H    | -0.12076 | 1.006583 | 1.981477 |
| 22 | H    | 1.247866 | -1.81315 | 6.313261 |
| 23 | H    | 4.823123 | -2.08295 | 2.034303 |
| 24 | H    | 4.747856 | -2.20559 | 3.817501 |
| 25 | H    | 5.678086 | -0.89735 | 3.04477  |

-----  
-----  
**TS (HMFA+Acrolein)**

|    | ATOM | X        | Y        | Z        |
|----|------|----------|----------|----------|
| 1  | C    | 0.290613 | -0.36633 | 0.657364 |
| 2  | C    | 1.415841 | -1.01414 | 1.459974 |
| 3  | C    | 1.90231  | -2.36203 | 1.114913 |
| 4  | C    | 2.248192 | -2.97441 | 2.286893 |
| 5  | C    | 1.904513 | -2.06871 | 3.331892 |
| 6  | H    | 2.122774 | -2.69339 | 0.106807 |
| 7  | H    | 2.792031 | -3.89933 | 2.433003 |
| 8  | C    | 2.113233 | -2.25638 | 4.774666 |
| 9  | O    | 2.751532 | -3.19107 | 5.2422   |
| 10 | O    | 1.055027 | -1.10127 | 2.861325 |
| 11 | C    | 3.641642 | -0.37769 | 2.656693 |
| 12 | C    | 2.787128 | 0.007162 | 1.542385 |
| 13 | C    | 4.746645 | -1.28251 | 2.449027 |

|    |   |          |          |          |
|----|---|----------|----------|----------|
| 14 | H | 3.531072 | 0.107069 | 3.624141 |
| 15 | H | 3.282509 | -0.11942 | 0.575168 |
| 16 | H | 2.326681 | 0.992202 | 1.654109 |
| 17 | O | 1.530812 | -1.26895 | 5.533838 |
| 18 | O | -0.08486 | 0.924699 | 1.158306 |
| 19 | H | -0.56991 | -1.05337 | 0.643837 |
| 20 | H | 0.637394 | -0.21591 | -0.37206 |
| 21 | H | -0.39447 | 0.796728 | 2.073826 |
| 22 | H | 1.738403 | -1.49417 | 6.465094 |
| 23 | O | 4.970407 | -1.85703 | 1.365854 |
| 24 | H | 5.378932 | -1.49461 | 3.33903  |

-----

-----

**TS (HMFA+Acrylic Acid)**

|    | ATOM | X        | Y        | Z        |
|----|------|----------|----------|----------|
| 1  | C    | 0.395114 | -0.08514 | 0.67572  |
| 2  | C    | 1.434759 | -0.90338 | 1.422594 |
| 3  | C    | 2.097693 | -2.07143 | 0.847565 |
| 4  | C    | 2.43252  | -2.88906 | 1.894258 |
| 5  | C    | 1.90265  | -2.26655 | 3.068541 |
| 6  | H    | 2.430123 | -2.1498  | -0.18123 |
| 7  | H    | 3.079703 | -3.758   | 1.896244 |
| 8  | C    | 1.992927 | -2.7009  | 4.464525 |
| 9  | O    | 2.929824 | -3.37105 | 4.902469 |
| 10 | O    | 0.964788 | -1.32703 | 2.705062 |
| 11 | C    | 3.498021 | -0.49529 | 3.043531 |
| 12 | C    | 2.795786 | 0.195407 | 2.001035 |
| 13 | C    | 4.743313 | -1.22299 | 2.710426 |
| 14 | H    | 3.277923 | -0.28803 | 4.088214 |
| 15 | H    | 3.386511 | 0.360605 | 1.098421 |
| 16 | H    | 2.198826 | 1.054578 | 2.309274 |
| 17 | O    | 0.965807 | -2.24802 | 5.246424 |
| 18 | O    | -0.10915 | 1.021147 | 1.43878  |
| 19 | H    | -0.42286 | -0.75455 | 0.363641 |
| 20 | H    | 0.860753 | 0.337537 | -0.22272 |
| 21 | H    | -0.5142  | 0.651704 | 2.244745 |
| 22 | H    | 1.158867 | -2.56262 | 6.155232 |
| 23 | O    | 5.304188 | -1.13549 | 1.623941 |
| 24 | O    | 5.267167 | -2.04799 | 3.681044 |
| 25 | H    | 4.57431  | -2.31333 | 4.325893 |

-----

**TS (HMFA+Methyl Acrylate)**

| ATOM |   | X        | Y        | Z        |
|------|---|----------|----------|----------|
| 1    | C | 0.190384 | -0.54002 | 0.362853 |
| 2    | C | 1.399593 | -0.98465 | 1.167935 |
| 3    | C | 2.435858 | -1.85977 | 0.628628 |
| 4    | C | 2.958767 | -2.54618 | 1.691942 |
| 5    | C | 2.193806 | -2.16491 | 2.833794 |
| 6    | H | 2.834034 | -1.79385 | -0.37782 |
| 7    | H | 3.842174 | -3.17131 | 1.732801 |
| 8    | C | 2.340589 | -2.67757 | 4.203746 |
| 9    | O | 3.256748 | -3.41147 | 4.547062 |
| 10   | O | 1.023791 | -1.56246 | 2.41934  |
| 11   | C | 3.018203 | 0.067018 | 2.994341 |
| 12   | C | 2.322617 | 0.468879 | 1.800357 |
| 13   | C | 4.462129 | -0.15025 | 3.085041 |
| 14   | H | 2.531161 | 0.180825 | 3.958214 |
| 15   | H | 2.955794 | 0.773129 | 0.966289 |
| 16   | H | 1.473861 | 1.135709 | 1.966436 |
| 17   | O | 1.360318 | -2.22191 | 5.053043 |
| 18   | O | -0.67    | 0.356387 | 1.083666 |
| 19   | H | -0.36147 | -1.43486 | 0.03285  |
| 20   | H | 0.537482 | 0.003638 | -0.52404 |
| 21   | H | -0.9583  | -0.11173 | 1.888837 |
| 22   | H | 1.578078 | -2.5966  | 5.932225 |
| 23   | O | 5.062017 | -0.22359 | 1.834445 |
| 24   | O | 5.089387 | -0.27386 | 4.13353  |
| 25   | C | 6.490475 | -0.51338 | 1.873181 |
| 26   | H | 6.805875 | -0.53847 | 0.825496 |
| 27   | H | 6.666102 | -1.47942 | 2.363724 |
| 28   | H | 7.021475 | 0.269939 | 2.427844 |

-----

**TS (FDCA+Propylene)**

| ATOM |   | X        | Y        | Z        |
|------|---|----------|----------|----------|
| 1    | C | 0.579534 | -0.14978 | 0.514726 |
| 2    | C | 1.355122 | -1.01594 | 1.424516 |
| 3    | C | 2.017893 | -2.23319 | 1.012674 |
| 4    | C | 2.353613 | -2.88887 | 2.160434 |
| 5    | C | 1.91975  | -2.02464 | 3.248564 |
| 6    | H | 2.260031 | -2.47375 | -0.0157  |
| 7    | H | 2.946007 | -3.78553 | 2.297098 |
| 8    | C | 1.79384  | -2.50114 | 4.652016 |
| 9    | O | 2.48251  | -3.40063 | 5.110189 |
| 10   | O | 0.917594 | -1.18653 | 2.741166 |

|    |   |          |          |          |
|----|---|----------|----------|----------|
| 11 | C | 3.362057 | -0.64139 | 3.252418 |
| 12 | C | 3.069802 | 0.129808 | 2.079607 |
| 13 | H | 4.245908 | -1.27713 | 3.258408 |
| 14 | H | 3.14658  | -0.16294 | 4.210097 |
| 15 | H | 3.691041 | -0.03717 | 1.200769 |
| 16 | C | 2.499543 | 1.524729 | 2.240551 |
| 17 | O | 0.879613 | -1.78967 | 5.381948 |
| 18 | O | -0.40641 | 0.559911 | 1.150603 |
| 19 | H | -0.82324 | 1.114684 | 0.457858 |
| 20 | H | 0.902892 | -2.16959 | 6.285672 |
| 21 | O | 0.831989 | -0.04326 | -0.67868 |
| 22 | H | 1.668699 | 1.516021 | 2.959484 |
| 23 | H | 2.134262 | 1.929435 | 1.28754  |
| 24 | H | 3.274822 | 2.20996  | 2.620838 |

-----  
-----

|    |      | <b>TS (FDCA+Acrolein)</b> |          |          |
|----|------|---------------------------|----------|----------|
|    | ATOM | X                         | Y        | Z        |
| 1  | C    | 1.059831                  | -0.83029 | 0.70529  |
| 2  | O    | 1.503617                  | -1.04845 | -1.53378 |
| 3  | C    | 2.564131                  | -2.2583  | 2.659686 |
| 4  | C    | 3.1574                    | -4.93976 | 2.345806 |
| 5  | C    | 3.592489                  | -5.85881 | 4.717142 |
| 6  | C    | 3.110226                  | -3.81024 | 6.436404 |
| 7  | H    | 3.455839                  | -5.83261 | 0.527422 |
| 8  | H    | 4.321561                  | -7.68253 | 5.295827 |
| 9  | C    | 3.103489                  | -3.97384 | 9.224354 |
| 10 | O    | 3.947514                  | -5.79478 | 10.35881 |
| 11 | O    | 1.688552                  | -1.99428 | 5.204061 |
| 12 | C    | 6.519173                  | -1.32933 | 5.563836 |
| 13 | C    | 5.650216                  | -0.69781 | 3.048601 |
| 14 | C    | 8.617129                  | -3.09435 | 5.951352 |
| 15 | H    | 6.115149                  | -0.04643 | 7.120332 |
| 16 | H    | 6.773357                  | -1.43628 | 1.482295 |
| 17 | H    | 5.143794                  | 1.28514  | 2.77739  |
| 18 | O    | 2.128922                  | -1.85467 | 10.34873 |
| 19 | O    | -0.74927                  | 0.78345  | 1.599842 |
| 20 | H    | -0.86471                  | 0.642146 | 3.443045 |
| 21 | H    | 2.276275                  | -2.12881 | 12.17574 |
| 22 | O    | 9.85182                   | -3.26882 | 7.912313 |
| 23 | H    | 9.017271                  | -4.34386 | 4.294902 |

**TS (FDCA+Acrylic Acid)**

|    | ATOM | X        | Y        | Z        |
|----|------|----------|----------|----------|
| 1  | C    | 0.379364 | -0.04964 | 0.637655 |
| 2  | C    | 1.103315 | -1.02357 | 1.480704 |
| 3  | C    | 1.612707 | -2.29834 | 1.039292 |
| 4  | C    | 2.09059  | -2.91829 | 2.154846 |
| 5  | C    | 1.93487  | -1.95124 | 3.247852 |
| 6  | H    | 1.65824  | -2.60881 | 0.002116 |
| 7  | H    | 2.624383 | -3.85616 | 2.25093  |
| 8  | C    | 1.920324 | -2.41249 | 4.675231 |
| 9  | O    | 2.645878 | -3.31173 | 5.06772  |
| 10 | O    | 0.909896 | -1.05996 | 2.842527 |
| 11 | C    | 3.39079  | -0.82    | 3.050877 |
| 12 | C    | 3.152459 | -0.08202 | 1.834816 |
| 13 | H    | 4.228116 | -1.51736 | 3.054786 |
| 14 | H    | 3.32611  | -0.20153 | 3.948764 |
| 15 | H    | 3.599388 | -0.42476 | 0.90387  |
| 16 | C    | 2.785431 | 1.353434 | 1.923114 |
| 17 | O    | 1.07123  | -1.69647 | 5.462377 |
| 18 | O    | -0.4503  | 0.76089  | 1.34247  |
| 19 | H    | -0.78828 | 1.434161 | 0.714181 |
| 20 | H    | 1.168621 | -2.05134 | 6.371928 |
| 21 | O    | 0.579524 | 0.028733 | -0.57086 |
| 22 | O    | 2.619255 | 1.972697 | 2.960391 |
| 23 | O    | 2.61837  | 2.004397 | 0.708483 |
| 24 | H    | 2.632194 | 1.359448 | -0.02613 |

-----  
-----

**TS (FDCA+Methyl Acrylate)**

|   | ATOM | X        | Y        | Z        |
|---|------|----------|----------|----------|
| 1 | C    | 0.111166 | 0.238609 | 1.066676 |
| 2 | C    | 1.035406 | -0.79704 | 1.583521 |
| 3 | C    | 1.415539 | -1.98363 | 0.855118 |
| 4 | C    | 2.093064 | -2.76828 | 1.73845  |
| 5 | C    | 2.179925 | -1.98862 | 2.979155 |
| 6 | H    | 1.238316 | -2.12574 | -0.20406 |
| 7 | H    | 2.614472 | -3.7041  | 1.575971 |
| 8 | C    | 2.443279 | -2.66839 | 4.287863 |
| 9 | O    | 3.203552 | -3.61859 | 4.383345 |



|    |   |          |          |          |
|----|---|----------|----------|----------|
| 10 | O | 1.112443 | -1.05847 | 2.937626 |
| 11 | C | 3.58912  | -0.8218  | 2.656924 |
| 12 | C | 3.090744 | 0.127841 | 1.68554  |
| 13 | H | 4.385449 | -1.48785 | 2.324116 |
| 14 | H | 3.761579 | -0.4066  | 3.650426 |
| 15 | H | 3.351428 | 0.019285 | 0.637244 |
| 16 | C | 2.719552 | 1.510879 | 2.049455 |
| 17 | O | 1.799023 | -2.08493 | 5.339649 |
| 18 | O | -0.35444 | 1.077981 | 2.040841 |
| 19 | H | -0.88671 | 1.75603  | 1.573514 |
| 20 | H | 2.067262 | -2.58835 | 6.137854 |
| 21 | O | -0.16649 | 0.336337 | -0.11879 |
| 22 | O | 2.613405 | 1.684174 | 3.410712 |
| 23 | O | 2.503578 | 2.404846 | 1.236067 |
| 24 | C | 2.120954 | 2.994127 | 3.819714 |
| 25 | H | 1.114227 | 3.151407 | 3.415054 |
| 26 | H | 2.78982  | 3.782782 | 3.454182 |
| 27 | H | 2.10403  | 2.964174 | 4.91285  |

-----

-----

**TS (FDCA-ester+Ethylene)**

|    | ATOM | X        | Y        | Z        |
|----|------|----------|----------|----------|
| 1  | C    | 0.14461  | -0.32874 | 0.780628 |
| 2  | O    | 0.131201 | -0.26788 | -0.4423  |
| 3  | C    | 1.167575 | -1.1066  | 1.52757  |
| 4  | C    | 1.867139 | -2.24696 | 0.971662 |
| 5  | C    | 2.468579 | -2.86846 | 2.028669 |
| 6  | C    | 2.119517 | -2.0912  | 3.199777 |
| 7  | H    | 1.95734  | -2.44623 | -0.08936 |
| 8  | H    | 3.167884 | -3.69596 | 2.035903 |
| 9  | C    | 2.307943 | -2.57823 | 4.591388 |
| 10 | O    | 3.149488 | -3.41656 | 4.887426 |
| 11 | O    | 0.972763 | -1.35226 | 2.8904   |
| 12 | C    | 3.376409 | -0.46334 | 2.968894 |
| 13 | C    | 2.745877 | 0.188309 | 1.865912 |
| 14 | H    | 4.335012 | -0.95756 | 2.820573 |
| 15 | H    | 3.224135 | -0.0413  | 3.962021 |
| 16 | H    | 3.232126 | 0.182771 | 0.891834 |
| 17 | H    | 2.141611 | 1.070631 | 2.075109 |
| 18 | O    | 1.487435 | -1.94991 | 5.479518 |
| 19 | O    | -0.71462 | 0.334133 | 1.604482 |
| 20 | C    | -1.71536 | 1.145274 | 0.90796  |
| 21 | C    | 1.656469 | -2.38131 | 6.868909 |

|    |   |          |          |          |
|----|---|----------|----------|----------|
| 22 | H | 2.686802 | -2.19644 | 7.19535  |
| 23 | H | 1.432336 | -3.45113 | 6.955725 |
| 24 | H | 0.942932 | -1.78017 | 7.438481 |
| 25 | H | -2.32097 | 1.589574 | 1.702209 |
| 26 | H | -2.32196 | 0.508954 | 0.25247  |
| 27 | H | -1.21802 | 1.916506 | 0.307236 |

-----  
 -----  
**TS (FDCA-ester+Propylene)**

|    | ATOM | X        | Y        | Z        |
|----|------|----------|----------|----------|
| 1  | C    | -0.16028 | -0.52941 | 0.806955 |
| 2  | O    | -0.16612 | -0.50045 | -0.41664 |
| 3  | C    | 0.810768 | -1.35416 | 1.580918 |
| 4  | C    | 1.365676 | -2.59477 | 1.064485 |
| 5  | C    | 1.903912 | -3.23743 | 2.142194 |
| 6  | C    | 1.648246 | -2.3875  | 3.281601 |
| 7  | H    | 1.423216 | -2.84082 | 0.011068 |
| 8  | H    | 2.510204 | -4.13425 | 2.175603 |
| 9  | C    | 1.875296 | -2.78126 | 4.686146 |
| 10 | O    | 2.700016 | -3.63236 | 5.003553 |
| 11 | O    | 0.589775 | -1.53526 | 2.954834 |
| 12 | C    | 3.098083 | -0.85597 | 2.928205 |
| 13 | C    | 2.441108 | -0.22378 | 1.821824 |
| 14 | C    | 4.411735 | -1.58    | 2.738762 |
| 15 | H    | 2.943193 | -0.39381 | 3.903732 |
| 16 | H    | 2.917218 | -0.28608 | 0.842452 |
| 17 | H    | 1.930257 | 0.719706 | 2.016062 |
| 18 | O    | 1.132344 | -2.05104 | 5.56747  |
| 19 | O    | -0.97456 | 0.210044 | 1.60934  |
| 20 | C    | -1.92041 | 1.066159 | 0.890082 |
| 21 | C    | 1.37176  | -2.37333 | 6.974546 |
| 22 | H    | 2.425808 | -2.20282 | 7.225719 |
| 23 | H    | 1.117339 | -3.42245 | 7.168018 |
| 24 | H    | 0.717226 | -1.69875 | 7.532876 |
| 25 | H    | -2.50211 | 1.561631 | 1.671889 |
| 26 | H    | -2.56144 | 0.454858 | 0.243767 |
| 27 | H    | -1.37408 | 1.794027 | 0.278027 |
| 28 | H    | 4.423788 | -2.0959  | 1.768327 |
| 29 | H    | 4.577975 | -2.31924 | 3.535064 |
| 30 | H    | 5.253823 | -0.86792 | 2.749888 |

-----  
 -----  
**TS (FDCA-ester+Acrolein)**

|    | ATOM | X        | Y        | Z        |
|----|------|----------|----------|----------|
| 1  | C    | 0.936929 | -3.40078 | 1.826903 |
| 2  | O    | 1.280449 | -4.23152 | 1.001223 |
| 3  | C    | 1.806642 | -2.21515 | 2.172622 |
| 4  | C    | 3.261335 | -2.42948 | 2.317572 |
| 5  | C    | 3.708999 | -1.45268 | 3.153069 |
| 6  | C    | 2.544425 | -0.71507 | 3.563237 |
| 7  | H    | 3.826314 | -3.13298 | 1.719054 |
| 8  | H    | 4.727367 | -1.17121 | 3.389657 |
| 9  | C    | 2.52155  | 0.399684 | 4.536055 |
| 10 | O    | 3.540395 | 0.971699 | 4.902966 |
| 11 | O    | 1.416414 | -1.46813 | 3.339456 |
| 12 | C    | 2.098987 | 0.268743 | 1.500588 |
| 13 | C    | 1.595461 | -0.99306 | 0.959635 |
| 14 | C    | 3.414636 | 0.755746 | 1.118574 |
| 15 | H    | 1.40116  | 0.971517 | 1.950918 |
| 16 | H    | 2.155597 | -1.34804 | 0.091749 |
| 17 | H    | 0.514742 | -0.99491 | 0.793456 |
| 18 | O    | 1.256766 | 0.713156 | 4.934495 |
| 19 | O    | -0.24893 | -3.38446 | 2.485517 |
| 20 | C    | -1.15103 | -4.49185 | 2.147185 |
| 21 | C    | 1.180437 | 1.821752 | 5.889221 |
| 22 | H    | 1.559515 | 2.739949 | 5.424641 |
| 23 | H    | 1.77774  | 1.589883 | 6.778689 |
| 24 | H    | 0.11867  | 1.908526 | 6.133584 |
| 25 | H    | -2.02575 | -4.34339 | 2.786059 |
| 26 | H    | -0.65936 | -5.44915 | 2.356354 |
| 27 | H    | -1.41578 | -4.44026 | 1.084643 |
| 28 | O    | 4.235291 | 0.094573 | 0.465804 |
| 29 | H    | 3.676659 | 1.769414 | 1.495723 |

-----  
-----

**TS (FDCA-ester+Acrylic Acid)**

|   | ATOM | X        | Y        | Z        |
|---|------|----------|----------|----------|
| 1 | C    | 0.629608 | -0.15558 | 0.602943 |
| 2 | O    | 0.79708  | -0.15437 | -0.60664 |
| 3 | C    | 1.466319 | -0.99693 | 1.523375 |
| 4 | C    | 1.977417 | -2.29835 | 1.094978 |
| 5 | C    | 2.268991 | -2.98426 | 2.237919 |
| 6 | C    | 1.875257 | -2.12242 | 3.325787 |
| 7 | H    | 2.210401 | -2.55046 | 0.068014 |
| 8 | H    | 2.801607 | -3.92043 | 2.354712 |
| 9 | C    | 1.881011 | -2.44219 | 4.768531 |

|    |   |          |          |          |
|----|---|----------|----------|----------|
| 10 | O | 2.803574 | -3.06933 | 5.296795 |
| 11 | O | 0.990413 | -1.1767  | 2.851891 |
| 12 | C | 3.573528 | -0.66769 | 3.089319 |
| 13 | C | 2.978395 | 0.017528 | 1.971619 |
| 14 | C | 4.771076 | -1.52232 | 2.841647 |
| 15 | H | 3.433867 | -0.2784  | 4.095792 |
| 16 | H | 3.572063 | 0.017262 | 1.057438 |
| 17 | H | 2.499016 | 0.970405 | 2.200194 |
| 18 | O | 0.812684 | -1.94716 | 5.431069 |
| 19 | O | -0.25971 | 0.618582 | 1.276365 |
| 20 | C | -1.07689 | 1.489311 | 0.42289  |
| 21 | C | 0.817829 | -2.18391 | 6.881194 |
| 22 | H | 1.70718  | -1.72412 | 7.32772  |
| 23 | H | 0.821159 | -3.26161 | 7.079811 |
| 24 | H | -0.10046 | -1.71455 | 7.24213  |
| 25 | H | -1.73131 | 2.025004 | 1.115018 |
| 26 | H | -1.65402 | 0.880469 | -0.28288 |
| 27 | H | -0.42963 | 2.178904 | -0.1318  |
| 28 | O | 5.375064 | -1.53617 | 1.77793  |
| 29 | O | 5.181237 | -2.32623 | 3.875375 |
| 30 | H | 4.447165 | -2.47301 | 4.51946  |

-----

-----

**TS (FDCA-ester+Methyl Acrylate)**

| ATOM |   | X        | Y         | Z        |
|------|---|----------|-----------|----------|
| 1    | C | 0.152579 | -0.35972  | 0.720509 |
| 2    | O | 0.127265 | -0.3133   | -0.50058 |
| 3    | C | 1.267633 | -1.03417  | 1.46609  |
| 4    | C | 1.915373 | -2.22639  | 0.919042 |
| 5    | C | 2.512823 | -2.84641  | 1.976118 |
| 6    | C | 2.168755 | -2.07334  | 3.139921 |
| 7    | H | 2.002995 | -2.43274  | -0.14043 |
| 8    | H | 3.201126 | -3.68211  | 1.98443  |
| 9    | C | 2.479595 | -2.45937  | 4.536989 |
| 10   | O | 3.241589 | -3.37841  | 4.803936 |
| 11   | O | 1.0658   | -1.29079  | 2.849936 |
| 12   | C | 3.434045 | -0.26609  | 2.762974 |
| 13   | C | 2.645942 | 0.196917  | 1.641844 |
| 14   | C | 4.796678 | -0.8048   | 2.646243 |
| 15   | H | 3.223567 | 0.147036  | 3.745379 |
| 16   | H | 3.136053 | 0.200315  | 6.69E-01 |
| 17   | H | 2.068628 | 1.102287  | 1.840933 |
| 18   | O | 1.86334  | -1.656358 | 5.447252 |
| 19   | O | -0.74933 | 0.224846  | 1.549817 |

|    |   |          |          |          |
|----|---|----------|----------|----------|
| 20 | C | -1.83677 | 0.933548 | 0.866036 |
| 21 | C | 2.189548 | -1.96839 | 6.841821 |
| 22 | H | 3.268291 | -1.85739 | 7.002392 |
| 23 | H | 1.88896  | -2.99721 | 7.073123 |
| 24 | H | 1.620455 | -1.24539 | 7.432006 |
| 25 | H | -2.45753 | 1.336956 | 1.669853 |
| 26 | H | -2.40061 | 0.231608 | 0.240649 |
| 27 | H | -1.42365 | 1.732036 | 0.238849 |
| 28 | O | 5.098266 | -1.2025  | 1.355893 |
| 29 | O | 5.580381 | -0.91752 | 3.583887 |
| 30 | C | 6.408614 | -1.82803 | 1.209941 |
| 31 | H | 6.488498 | -2.07797 | 0.147765 |
| 32 | H | 6.466722 | -2.72737 | 1.835819 |
| 33 | H | 7.198219 | -1.12948 | 1.512935 |

**TS (DMF+Ethylene)**

|  | ATOM | X | Y        | Z        |          |
|--|------|---|----------|----------|----------|
|  | 1    | H | -0.37669 | -0.06187 | 0.79932  |
|  | 2    | C | 0.701911 | 0.150157 | 0.800449 |
|  | 3    | H | 0.862772 | 1.101926 | 1.319566 |
|  | 4    | H | 1.027851 | 0.266155 | -0.23945 |
|  | 5    | C | 1.469054 | -0.95062 | 1.452702 |
|  | 6    | C | 1.716112 | -2.26137 | 0.955236 |
|  | 7    | C | 2.102529 | -3.02449 | 2.033654 |
|  | 8    | C | 2.08707  | -2.16411 | 3.167369 |
|  | 9    | C | 3.911044 | -1.11469 | 2.752807 |
|  | 10   | C | 3.518484 | -0.33601 | 1.654911 |
|  | 11   | H | 1.739544 | -2.53343 | -0.09523 |
|  | 12   | H | 2.504018 | -4.03306 | 2.02533  |
|  | 13   | H | 4.608132 | -1.9401  | 2.61405  |
|  | 14   | H | 3.252973 | 0.708782 | 1.816845 |
|  | 15   | C | 2.076741 | -2.54444 | 4.610321 |
|  | 16   | H | 2.870738 | -3.27353 | 4.807964 |
|  | 17   | H | 1.117206 | -2.99494 | 4.900456 |
|  | 18   | H | 2.250099 | -1.66856 | 5.245766 |
|  | 19   | O | 1.333315 | -1.05036 | 2.828661 |
|  | 20   | H | 3.944602 | -0.65489 | 3.740553 |
|  | 21   | H | 3.909048 | -0.55474 | 0.661921 |

-----  
-----  
**TS (DMF+Propylene)**

|  | ATOM | X | Y | Z |
|--|------|---|---|---|
|--|------|---|---|---|

|    |   |          |          |          |
|----|---|----------|----------|----------|
| 1  | C | 0.186066 | -0.23362 | 0.763177 |
| 2  | C | 1.235982 | -1.06555 | 1.44032  |
| 3  | C | 1.827328 | -2.27892 | 0.944714 |
| 4  | C | 2.391327 | -2.91167 | 2.029665 |
| 5  | C | 2.13757  | -2.07972 | 3.168418 |
| 6  | H | 1.940649 | -2.52611 | -0.10623 |
| 7  | H | 3.052864 | -3.77172 | 2.027566 |
| 8  | C | 2.238365 | -2.4522  | 4.61627  |
| 9  | O | 1.07832  | -1.22757 | 2.824896 |
| 10 | C | 3.587802 | -0.54824 | 2.776401 |
| 11 | C | 2.952615 | 0.092027 | 1.677164 |
| 12 | C | 4.914097 | -1.25872 | 2.58844  |
| 13 | H | 3.431205 | -0.09947 | 3.758925 |
| 14 | H | 3.426753 | 0.029601 | 0.696189 |
| 15 | H | 2.405159 | 1.017663 | 1.857054 |
| 16 | H | -0.78646 | -0.74946 | 0.757257 |
| 17 | H | 0.48526  | -0.04145 | -0.27576 |
| 18 | H | 2.186167 | -1.55542 | 5.247549 |
| 19 | H | 3.200689 | -2.94969 | 4.796802 |
| 20 | H | 1.430371 | -3.13808 | 4.915809 |
| 21 | H | 0.067525 | 0.73005  | 1.275551 |
| 22 | H | 4.925788 | -1.78377 | 1.622339 |
| 23 | H | 5.097619 | -1.99643 | 3.384637 |
| 24 | H | 5.756677 | -0.54657 | 2.592552 |

-----

-----

|      |   | <b>TS (DMF+Acrolein)</b> |          |          |
|------|---|--------------------------|----------|----------|
| ATOM |   | X                        | Y        | Z        |
| 1    | H | 0.820397                 | -4.18311 | 1.668915 |
| 2    | C | 1.01372                  | -3.30029 | 1.046664 |
| 3    | H | 1.605157                 | -3.60084 | 0.171202 |
| 4    | C | 1.791826                 | -2.24765 | 1.821577 |
| 5    | C | 3.055459                 | -2.61446 | 2.474447 |
| 6    | C | 3.089283                 | -1.97858 | 3.699796 |
| 7    | C | 1.855793                 | -1.33507 | 3.882156 |
| 8    | H | 3.856155                 | -3.15277 | 1.984714 |
| 9    | H | 3.933218                 | -1.90042 | 4.375724 |
| 10   | C | 1.338306                 | -0.51754 | 5.015219 |
| 11   | H | 2.169877                 | -0.14361 | 5.623912 |
| 12   | H | 0.673946                 | -1.11966 | 5.657812 |
| 13   | O | 0.978548                 | -1.6719  | 2.903496 |
| 14   | C | 2.661289                 | 0.233072 | 1.462293 |
| 15   | C | 2.057798                 | -0.92683 | 0.812793 |

|    |   |          |          |          |
|----|---|----------|----------|----------|
| 16 | C | 4.051583 | 0.225409 | 1.70334  |
| 17 | H | 2.05163  | 1.076278 | 1.782273 |
| 18 | H | 2.717963 | -1.35918 | 0.051788 |
| 19 | H | 1.058319 | -0.72985 | 0.412098 |
| 20 | H | 0.060708 | -2.88271 | 0.698102 |
| 21 | H | 0.754057 | 0.332581 | 4.63844  |
| 22 | O | 4.797501 | -0.76134 | 1.430625 |
| 23 | H | 4.487948 | 1.122161 | 2.195547 |

-----

-----

**TS (DMF+Acrylic Acid)**

|    | ATOM | X        | Y        | Z        |
|----|------|----------|----------|----------|
| 1  | C    | 0.166561 | -0.4023  | 0.788559 |
| 2  | C    | 1.308637 | -1.08914 | 1.498539 |
| 3  | C    | 1.897917 | -2.34456 | 1.056798 |
| 4  | C    | 2.407036 | -2.96064 | 2.172238 |
| 5  | C    | 2.051432 | -2.15334 | 3.288389 |
| 6  | H    | 2.090174 | -2.59946 | 0.02055  |
| 7  | H    | 3.079799 | -3.80982 | 2.209949 |
| 8  | C    | 2.220336 | -2.41872 | 4.746394 |
| 9  | O    | 1.083597 | -1.2581  | 2.909005 |
| 10 | C    | 3.589416 | -0.37818 | 2.679566 |
| 11 | C    | 2.73624  | 0.054745 | 1.604274 |
| 12 | C    | 4.79755  | -1.13576 | 2.387158 |
| 13 | H    | 3.450723 | 0.045069 | 3.67289  |
| 14 | H    | 3.197646 | 0.009519 | 0.615861 |
| 15 | H    | 2.203969 | 0.991993 | 1.785878 |
| 16 | H    | -0.72844 | -1.03843 | 0.77883  |
| 17 | H    | 0.462269 | -0.191   | -0.24762 |
| 18 | H    | 2.159021 | -1.4849  | 5.319    |
| 19 | O    | 5.110411 | -1.58267 | 1.288329 |
| 20 | O    | 5.632182 | -1.41649 | 3.481729 |
| 21 | H    | 5.271491 | -0.97277 | 4.271926 |
| 22 | H    | 3.195655 | -2.89021 | 4.920998 |
| 23 | H    | 1.434769 | -3.09925 | 5.114363 |
| 24 | H    | -0.07149 | 0.547953 | 1.283399 |

-----

-----

**TS (DMF+Methyl Acrylate)**

|   | ATOM | X      | Y       | Z        |
|---|------|--------|---------|----------|
| 1 | C    | 0.2278 | -0.4026 | 0.958588 |

|    |   |          |          |          |
|----|---|----------|----------|----------|
| 2  | C | 1.408683 | -1.07257 | 1.615932 |
| 3  | C | 2.065601 | -2.26067 | 1.095667 |
| 4  | C | 2.648057 | -2.88921 | 2.16758  |
| 5  | C | 2.27159  | -2.15783 | 3.334253 |
| 6  | H | 2.234702 | -2.45684 | 0.042342 |
| 7  | H | 3.364728 | -3.70312 | 2.156992 |
| 8  | C | 2.507656 | -2.47791 | 4.770837 |
| 9  | O | 1.219642 | -1.33049 | 3.012121 |
| 10 | C | 3.637941 | -0.30683 | 2.875641 |
| 11 | C | 2.810299 | 0.152469 | 1.792971 |
| 12 | C | 4.927892 | -0.96163 | 2.724049 |
| 13 | H | 3.447039 | 0.0501   | 3.883114 |
| 14 | H | 3.27437  | 0.180544 | 0.807031 |
| 15 | H | 2.220257 | 1.046051 | 2.011298 |
| 16 | H | -0.6405  | -1.07533 | 0.935488 |
| 17 | H | 0.492147 | -0.13227 | -0.07256 |
| 18 | H | 2.197205 | -1.63581 | 5.400734 |
| 19 | O | 5.256208 | -1.19799 | 1.389789 |
| 20 | O | 5.661271 | -1.3166  | 3.650547 |
| 21 | H | 3.579721 | -2.65866 | 4.926212 |
| 22 | H | 1.944593 | -3.37461 | 5.07732  |
| 23 | H | -0.04272 | 0.512226 | 1.501314 |
| 24 | C | 6.496741 | -1.93301 | 1.202774 |
| 25 | H | 6.639818 | -1.98928 | 0.118772 |
| 26 | H | 6.415282 | -2.9372  | 1.640656 |
| 27 | H | 7.330344 | -1.40534 | 1.682955 |

-----  
-----
